# Supplementary material for: A toxin-antidote selfish element increases fitness of its host
Source: eLife. 2023 Oct 24;12:e81640. doi: 10.7554/eLife.81640 (PMC10629817; doi:10.7554/eLife.81640)
Supplement: Figure 1—source data 1. [file elife-81640-fig1-data1.xlsx]

## Sheet: Figure 1F
row	fitness cost	peelzeel frequency	allele change
0	0	0.0108502	0.000116436
1	0	0.0234802	0.000538065
2	0	0.0383514	0.0014122
3	0	0.0558798	0.00293796
4	0	0.0765306	0.00537295
5	0	0.1008	0.00902869
6	0	0.129175	0.0142415
7	0	0.162072	0.0213012
8	0	0.199735	0.0303251
9	0	0.24212	0.0410868
10	0	0.288769	0.0528665
11	0	0.338739	0.0644414
12	0	0.390616	0.0743244
13	0	0.44267	0.0812137
14	0	0.493113	0.084432
15	0	0.540391	0.0840909
16	0	0.583403	0.0809173
17	0	0.62158	0.0758993
18	0	0.654838	0.0699701
19	0	0.683444	0.0638386
20	0	0.70787	0.0579573
21	0	0.72867	0.0525664
22	0	0.746396	0.0477591
23	0	0.761553	0.0435407
24	0	0.774579	0.0398705
25	0	0.785843	0.0366881
26	0	0.795648	0.0339287
27	0	0.804242	0.0315308
28	0	0.811827	0.0294396
29	0	0.818566	0.0276075
30	0	0.824592	0.0259944
31	0	0.830012	0.0245667
32	0	0.834915	0.0232964
33	0	0.839375	0.0221602
34	0	0.843452	0.0211389
35	0	0.847196	0.0202162
36	0	0.85065	0.0193787
37	0	0.853848	0.0186153
38	0	0.856822	0.0179163
39	0	0.859598	0.0172737
40	0	0.862196	0.0166806
41	0	0.864637	0.0161314
42	0	0.866938	0.0156208
43	0	0.869112	0.0151446
44	0	0.871173	0.0146991
45	0	0.873131	0.014281
46	0	0.874998	0.0138874
47	0	0.876781	0.0135158
48	0	0.878489	0.013164
49	0	0.880129	0.0128301
50	0	0.881707	0.0125122
51	0	0.883231	0.0122088
52	0	0.884704	0.0119185
53	0	0.886132	0.01164
54	0	0.88752	0.0113722
55	0	0.888872	0.011114
56	0	0.890193	0.0108644
57	0	0.891485	0.0106225
58	0	0.892754	0.0103876
59	0	0.894002	0.0101587
60	0	0.895232	0.00993529
61	0	0.896449	0.00971657
62	0	0.897655	0.00950194
63	0	0.898854	0.00929078
64	0	0.900048	0.0090825
65	0	0.901242	0.00887654
66	0	0.902437	0.00867236
67	0	0.903638	0.00846942
68	0	0.904848	0.0082672
69	0	0.906071	0.00806518
70	0	0.907309	0.00786287
71	0	0.908566	0.00765974
72	0	0.909848	0.0074553
73	0	0.911157	0.00724904
74	0	0.912499	0.00704043
75	0	0.913878	0.00682895
76	0	0.915299	0.00661408
77	0	0.916768	0.00639526
78	0	0.918292	0.00617195
79	0	0.919876	0.00594357
80	0	0.92153	0.00570955
81	0	0.92326	0.00546929
82	0	0.925077	0.00522221
83	0	0.926991	0.00496768
84	0	0.929013	0.00470514
85	0	0.931158	0.00443398
86	0	0.933441	0.00415369
87	0	0.935879	0.00386377
88	0	0.938493	0.00356387
89	0	0.941308	0.00325378
90	0	0.944351	0.00293355
91	0	0.947656	0.00260362
92	0	0.951262	0.00226498
93	0	0.955218	0.00191947
94	0	0.959581	0.00157022
95	0	0.964423	0.00122224
96	0	0.969832	0.000883451
97	0	0.97592	0.000566227
98	0	0.982828	0.000289912
99	0	0.99074	8.49633e-05
100	0.3	0.00572912	-0.000397704
101	0.3	0.0122092	-0.000771076
102	0.3	0.0196311	-0.00110036
103	0.3	0.0281568	-0.00135114
104	0.3	0.037977	-0.00147451
105	0.3	0.0493147	-0.00140211
106	0.3	0.0624282	-0.00104031
107	0.3	0.0776119	-0.000263864
108	0.3	0.0951929	0.00108938
109	0.3	0.115522	0.00321977
110	0.3	0.138956	0.00635799
111	0.3	0.165821	0.0107401
112	0.3	0.19637	0.0165567
113	0.3	0.230712	0.0238715
114	0.3	0.268737	0.0325184
115	0.3	0.310047	0.0420148
116	0.3	0.353913	0.0515501
117	0.3	0.399292	0.0601086
118	0.3	0.444919	0.0667196
119	0.3	0.489467	0.0707355
120	0.3	0.531728	0.0719985
121	0.3	0.570769	0.0708152
122	0.3	0.606016	0.0677841
123	0.3	0.63725	0.0635838
124	0.3	0.664543	0.0588158
125	0.3	0.68817	0.0539312
126	0.3	0.708512	0.0492238
127	0.3	0.725991	0.044858
128	0.3	0.741018	0.0409067
129	0.3	0.753971	0.0373841
130	0.3	0.765181	0.0342715
131	0.3	0.774929	0.0315337
132	0.3	0.783453	0.029129
133	0.3	0.790949	0.0270158
134	0.3	0.79758	0.025155
135	0.3	0.80348	0.0235116
136	0.3	0.808759	0.0220549
137	0.3	0.813508	0.0207586
138	0.3	0.817803	0.0196002
139	0.3	0.821706	0.0185605
140	0.3	0.825271	0.0176233
141	0.3	0.828541	0.016775
142	0.3	0.831553	0.0160039
143	0.3	0.834339	0.0153001
144	0.3	0.836926	0.0146551
145	0.3	0.839337	0.0140619
146	0.3	0.841592	0.0135142
147	0.3	0.843708	0.0130067
148	0.3	0.8457	0.0125349
149	0.3	0.847581	0.0120947
150	0.3	0.849363	0.0116826
151	0.3	0.851056	0.0112956
152	0.3	0.852669	0.0109311
153	0.3	0.85421	0.0105866
154	0.3	0.855688	0.0102601
155	0.3	0.857108	0.00994966
156	0.3	0.858477	0.00965359
157	0.3	0.859801	0.00937038
158	0.3	0.861084	0.00909865
159	0.3	0.862331	0.00883713
160	0.3	0.863548	0.00858466
161	0.3	0.864738	0.00834018
162	0.3	0.865907	0.00810267
163	0.3	0.867057	0.00787122
164	0.3	0.868192	0.00764493
165	0.3	0.869318	0.00742296
166	0.3	0.870437	0.00720451
167	0.3	0.871554	0.0069888
168	0.3	0.872672	0.00677505
169	0.3	0.873796	0.00656254
170	0.3	0.87493	0.0063505
171	0.3	0.876078	0.00613821
172	0.3	0.877246	0.0059249
173	0.3	0.878437	0.00570982
174	0.3	0.879657	0.00549218
175	0.3	0.880913	0.00527117
176	0.3	0.882211	0.00504595
177	0.3	0.883557	0.00481565
178	0.3	0.88496	0.00457934
179	0.3	0.886429	0.00433603
180	0.3	0.887973	0.00408471
181	0.3	0.889603	0.00382426
182	0.3	0.891334	0.00355352
183	0.3	0.89318	0.00327124
184	0.3	0.895158	0.00297614
185	0.3	0.89729	0.00266684
186	0.3	0.899601	0.00234197
187	0.3	0.902119	0.00200014
188	0.3	0.90488	0.00164007
189	0.3	0.90793	0.00126075
190	0.3	0.911321	0.00086159
191	0.3	0.915123	0.00044293
192	0.3	0.919422	6.67578e-06
193	0.3	0.92433	-0.000442462
194	0.3	0.929998	-0.000894814
195	0.3	0.936624	-0.00133182
196	0.3	0.944485	-0.00171861
197	0.3	0.953975	-0.00198936
198	0.3	0.96567	-0.00201692
199	0.3	0.980458	-0.00154508
200	0.6	0.00287317	-0.000423432
201	0.6	0.00603556	-0.000872081
202	0.6	0.00955822	-0.00135044
203	0.6	0.0134917	-0.00185803
204	0.6	0.0178947	-0.00239312
205	0.6	0.0228357	-0.00295219
206	0.6	0.0283942	-0.00352913
207	0.6	0.0346628	-0.00411421
208	0.6	0.0417494	-0.00469267
209	0.6	0.0497786	-0.00524288
210	0.6	0.0588945	-0.00573387
211	0.6	0.0692623	-0.00612241
212	0.6	0.081069	-0.00634928
213	0.6	0.0945241	-0.00633537
214	0.6	0.109856	-0.00597774
215	0.6	0.127309	-0.00514723
216	0.6	0.147127	-0.0036893
217	0.6	0.169543	-0.00143168
218	0.6	0.194749	0.00179707
219	0.6	0.222861	0.00613409
220	0.6	0.253879	0.0116325
221	0.6	0.287645	0.018202
222	0.6	0.323802	0.0255582
223	0.6	0.361784	0.0332101
224	0.6	0.400831	0.0405123
225	0.6	0.440047	0.0467877
226	0.6	0.478495	0.051483
227	0.6	0.515296	0.0542948
228	0.6	0.549733	0.0552129
229	0.6	0.581305	0.0544728
230	0.6	0.609746	0.0524535
231	0.6	0.635002	0.0495704
232	0.6	0.657186	0.0461984
233	0.6	0.67652	0.0426341
234	0.6	0.693286	0.039088
235	0.6	0.707787	0.0356949
236	0.6	0.72032	0.0325318
237	0.6	0.731162	0.0296338
238	0.6	0.74056	0.0270093
239	0.6	0.748729	0.02465
240	0.6	0.755854	0.0225384
241	0.6	0.762094	0.0206527
242	0.6	0.767581	0.0189701
243	0.6	0.772426	0.0174679
244	0.6	0.776723	0.016125
245	0.6	0.780551	0.0149222
246	0.6	0.783976	0.0138424
247	0.6	0.787052	0.0128705
248	0.6	0.789828	0.0119931
249	0.6	0.792341	0.0111988
250	0.6	0.794626	0.0104774
251	0.6	0.796711	0.00982025
252	0.6	0.798621	0.00921968
253	0.6	0.800377	0.00866911
254	0.6	0.801997	0.00816278
255	0.6	0.803495	0.00769567
256	0.6	0.804887	0.00726339
257	0.6	0.806184	0.00686207
258	0.6	0.807396	0.00648831
259	0.6	0.808533	0.00613909
260	0.6	0.809603	0.00581176
261	0.6	0.810613	0.00550392
262	0.6	0.81157	0.00521342
263	0.6	0.812479	0.00493833
264	0.6	0.813347	0.0046769
265	0.6	0.814179	0.0044275
266	0.6	0.814978	0.00418867
267	0.6	0.81575	0.003959
268	0.6	0.816498	0.0037372
269	0.6	0.817227	0.00352203
270	0.6	0.81794	0.0033123
271	0.6	0.818642	0.00310684
272	0.6	0.819336	0.0029045
273	0.6	0.820027	0.00270412
274	0.6	0.820717	0.00250454
275	0.6	0.821413	0.00230453
276	0.6	0.822118	0.00210281
277	0.6	0.822837	0.00189802
278	0.6	0.823576	0.00168868
279	0.6	0.824341	0.00147315
280	0.6	0.82514	0.0012496
281	0.6	0.825979	0.00101598
282	0.6	0.82687	0.000769889
283	0.6	0.827822	0.00050857
284	0.6	0.828851	0.00022874
285	0.6	0.829971	-7.35281e-05
286	0.6	0.831205	-0.000403002
287	0.6	0.832577	-0.000765557
288	0.6	0.834122	-0.00116853
289	0.6	0.835884	-0.00162125
290	0.6	0.837921	-0.00213574
291	0.6	0.840315	-0.00272775
292	0.6	0.84318	-0.00341834
293	0.6	0.846685	-0.00423606
294	0.6	0.851088	-0.00522022
295	0.6	0.856805	-0.0064249
296	0.6	0.864555	-0.00792175
297	0.6	0.875699	-0.0097868
298	0.6	0.893161	-0.0119816
299	0.6	0.924609	-0.0134271

## Sheet: Figure 1G
row	outcrossing rate	peelzeel frequency	allele change
0	0.1	0.000868962	-0.000252327
1	0.1	0.0017593	-0.000510494
2	0.1	0.00268089	-0.000777327
3	0.1	0.00363501	-0.00105316
4	0.1	0.00462303	-0.00133834
5	0.1	0.00564637	-0.00163322
6	0.1	0.00670653	-0.0019382
7	0.1	0.00780508	-0.00225365
8	0.1	0.00894366	-0.00258
9	0.1	0.010124	-0.00291767
10	0.1	0.011348	-0.00326711
11	0.1	0.0126174	-0.00362879
12	0.1	0.0139344	-0.00400319
13	0.1	0.015301	-0.00439083
14	0.1	0.0167194	-0.00479224
15	0.1	0.0181921	-0.00520796
16	0.1	0.0197214	-0.00563859
17	0.1	0.02131	-0.00608472
18	0.1	0.0229606	-0.00654698
19	0.1	0.0246762	-0.00702602
20	0.1	0.0264596	-0.00752253
21	0.1	0.0283142	-0.00803723
22	0.1	0.0302433	-0.00857084
23	0.1	0.0322505	-0.00912415
24	0.1	0.0343396	-0.00969796
25	0.1	0.0365144	-0.0102931
26	0.1	0.0387794	-0.0109104
27	0.1	0.0411388	-0.0115509
28	0.1	0.0435973	-0.0122153
29	0.1	0.04616	-0.0129048
30	0.1	0.0488319	-0.0136203
31	0.1	0.0516188	-0.0143628
32	0.1	0.0545264	-0.0151334
33	0.1	0.0575608	-0.0159333
34	0.1	0.0607288	-0.0167635
35	0.1	0.0640371	-0.0176253
36	0.1	0.0674931	-0.0185197
37	0.1	0.0711046	-0.0194482
38	0.1	0.0748797	-0.0204118
39	0.1	0.0788273	-0.0214118
40	0.1	0.0829563	-0.0224496
41	0.1	0.0872767	-0.0235264
42	0.1	0.0917986	-0.0246436
43	0.1	0.0965331	-0.0258022
44	0.1	0.101492	-0.0270037
45	0.1	0.106686	-0.0282493
46	0.1	0.11213	-0.02954
47	0.1	0.117836	-0.030877
48	0.1	0.12382	-0.0322614
49	0.1	0.130096	-0.0336939
50	0.1	0.13668	-0.0351753
51	0.1	0.14359	-0.0367062
52	0.1	0.150843	-0.0382869
53	0.1	0.158457	-0.0399175
54	0.1	0.166454	-0.0415978
55	0.1	0.174852	-0.043327
56	0.1	0.183674	-0.0451043
57	0.1	0.192943	-0.0469278
58	0.1	0.202681	-0.0487956
59	0.1	0.212915	-0.0507045
60	0.1	0.223668	-0.052651
61	0.1	0.234967	-0.0546303
62	0.1	0.24684	-0.0566367
63	0.1	0.259313	-0.058663
64	0.1	0.272415	-0.0607011
65	0.1	0.286173	-0.0627408
66	0.1	0.300617	-0.0647704
67	0.1	0.315775	-0.0667762
68	0.1	0.331672	-0.0687424
69	0.1	0.348335	-0.0706505
70	0.1	0.365788	-0.0724798
71	0.1	0.384053	-0.0742065
72	0.1	0.403148	-0.0758042
73	0.1	0.423087	-0.0772431
74	0.1	0.443879	-0.0784906
75	0.1	0.465527	-0.079511
76	0.1	0.488025	-0.0802655
77	0.1	0.511358	-0.0807133
78	0.1	0.535501	-0.0808113
79	0.1	0.560415	-0.0805155
80	0.1	0.586046	-0.0797819
81	0.1	0.612325	-0.078568
82	0.1	0.639164	-0.0768351
83	0.1	0.666453	-0.0745502
84	0.1	0.694061	-0.071689
85	0.1	0.721835	-0.0682393
86	0.1	0.749596	-0.064204
87	0.1	0.777143	-0.0596052
88	0.1	0.804251	-0.0544877
89	0.1	0.830673	-0.0489212
90	0.1	0.856145	-0.0430033
91	0.1	0.880389	-0.036859
92	0.1	0.903121	-0.0306401
93	0.1	0.924054	-0.0245211
94	0.1	0.942909	-0.0186925
95	0.1	0.959426	-0.0133524
96	0.1	0.973366	-0.00869568
97	0.1	0.984528	-0.00490114
98	0.1	0.992752	-0.00211988
99	0.1	0.997927	-0.00046405
100	0.2	0.0012197	-0.000304899
101	0.2	0.00247624	-0.000618084
102	0.2	0.00378394	-0.000943019
103	0.2	0.0051451	-0.00128016
104	0.2	0.00656217	-0.00162998
105	0.2	0.00803773	-0.00199296
106	0.2	0.00957446	-0.00236962
107	0.2	0.0111752	-0.00276048
108	0.2	0.0128429	-0.00316608
109	0.2	0.0145808	-0.00358697
110	0.2	0.016392	-0.00402373
111	0.2	0.0182801	-0.00447696
112	0.2	0.0202487	-0.00494725
113	0.2	0.0223015	-0.00543523
114	0.2	0.0244426	-0.00594155
115	0.2	0.0266762	-0.00646685
116	0.2	0.0290067	-0.0070118
117	0.2	0.0314387	-0.00757707
118	0.2	0.0339771	-0.00816336
119	0.2	0.036627	-0.00877134
120	0.2	0.0393937	-0.00940174
121	0.2	0.0422829	-0.0100552
122	0.2	0.0453004	-0.0107325
123	0.2	0.0484524	-0.0114343
124	0.2	0.0517454	-0.0121613
125	0.2	0.0551861	-0.0129141
126	0.2	0.0587816	-0.0136935
127	0.2	0.0625394	-0.0144999
128	0.2	0.0664671	-0.0153341
129	0.2	0.0705728	-0.0161965
130	0.2	0.0748649	-0.0170876
131	0.2	0.0793523	-0.0180079
132	0.2	0.0840441	-0.0189577
133	0.2	0.0889497	-0.0199373
134	0.2	0.094079	-0.0209468
135	0.2	0.0994423	-0.0219863
136	0.2	0.10505	-0.0230556
137	0.2	0.110914	-0.0241545
138	0.2	0.117044	-0.0252826
139	0.2	0.123452	-0.0264393
140	0.2	0.130152	-0.0276236
141	0.2	0.137153	-0.0288345
142	0.2	0.14447	-0.0300707
143	0.2	0.152114	-0.0313305
144	0.2	0.1601	-0.0326118
145	0.2	0.168439	-0.0339124
146	0.2	0.177145	-0.0352295
147	0.2	0.186231	-0.03656
148	0.2	0.195711	-0.0379002
149	0.2	0.205596	-0.0392462
150	0.2	0.2159	-0.0405934
151	0.2	0.226636	-0.0419367
152	0.2	0.237815	-0.0432705
153	0.2	0.249448	-0.0445887
154	0.2	0.261547	-0.0458846
155	0.2	0.274121	-0.0471509
156	0.2	0.287178	-0.0483798
157	0.2	0.300727	-0.049563
158	0.2	0.314773	-0.0506915
159	0.2	0.329321	-0.0517559
160	0.2	0.344375	-0.0527466
161	0.2	0.359934	-0.0536533
162	0.2	0.375998	-0.0544656
163	0.2	0.392562	-0.0551727
164	0.2	0.409621	-0.0557638
165	0.2	0.427166	-0.0562283
166	0.2	0.445183	-0.0565553
167	0.2	0.463659	-0.0567345
168	0.2	0.482573	-0.0567559
169	0.2	0.501903	-0.0566101
170	0.2	0.521622	-0.0562885
171	0.2	0.5417	-0.0557835
172	0.2	0.562102	-0.0550884
173	0.2	0.582789	-0.054198
174	0.2	0.603716	-0.0531088
175	0.2	0.624836	-0.0518187
176	0.2	0.646095	-0.0503277
177	0.2	0.667436	-0.048638
178	0.2	0.688796	-0.0467542
179	0.2	0.710108	-0.0446834
180	0.2	0.7313	-0.0424355
181	0.2	0.752295	-0.0400232
182	0.2	0.773015	-0.0374627
183	0.2	0.793374	-0.0347731
184	0.2	0.813285	-0.0319771
185	0.2	0.832659	-0.0291004
186	0.2	0.851403	-0.0261723
187	0.2	0.869424	-0.0232252
188	0.2	0.886627	-0.0202941
189	0.2	0.902921	-0.0174166
190	0.2	0.918213	-0.0146321
191	0.2	0.932416	-0.0119809
192	0.2	0.945446	-0.0095036
193	0.2	0.957226	-0.0072398
194	0.2	0.967686	-0.00522718
195	0.2	0.976762	-0.00350023
196	0.2	0.984405	-0.00208906
197	0.2	0.990572	-0.00101841
198	0.2	0.995234	-0.000306664
199	0.2	0.998376	3.48475e-05
200	0.3	0.00160562	-0.000349986
201	0.3	0.00327099	-0.000711003
202	0.3	0.00501591	-0.00108709
203	0.3	0.00684451	-0.00147882
204	0.3	0.00876117	-0.0018868
205	0.3	0.0107705	-0.00231163
206	0.3	0.0128773	-0.00275393
207	0.3	0.0150868	-0.00321432
208	0.3	0.0174044	-0.00369342
209	0.3	0.0198356	-0.00419187
210	0.3	0.0223866	-0.00471027
211	0.3	0.0250635	-0.00524925
212	0.3	0.027873	-0.00580939
213	0.3	0.030822	-0.00639127
214	0.3	0.0339178	-0.00699544
215	0.3	0.037168	-0.00762242
216	0.3	0.0405805	-0.00827266
217	0.3	0.0441638	-0.00894659
218	0.3	0.0479265	-0.00964454
219	0.3	0.0518777	-0.0103668
220	0.3	0.0560268	-0.0111135
221	0.3	0.0603838	-0.0118847
222	0.3	0.0649587	-0.0126804
223	0.3	0.0697622	-0.0135003
224	0.3	0.074805	-0.0143441
225	0.3	0.0800984	-0.0152112
226	0.3	0.0856539	-0.0161008
227	0.3	0.0914831	-0.017012
228	0.3	0.0975982	-0.0179435
229	0.3	0.104011	-0.0188938
230	0.3	0.110734	-0.019861
231	0.3	0.11778	-0.0208429
232	0.3	0.12516	-0.0218371
233	0.3	0.132887	-0.0228407
234	0.3	0.140973	-0.0238503
235	0.3	0.149429	-0.0248624
236	0.3	0.158267	-0.0258728
237	0.3	0.167497	-0.0268771
238	0.3	0.17713	-0.0278703
239	0.3	0.187173	-0.0288471
240	0.3	0.197636	-0.0298018
241	0.3	0.208526	-0.0307284
242	0.3	0.219848	-0.0316205
243	0.3	0.231605	-0.0324716
244	0.3	0.243802	-0.0332749
245	0.3	0.256438	-0.0340235
246	0.3	0.269513	-0.0347104
247	0.3	0.283022	-0.035329
248	0.3	0.296961	-0.0358726
249	0.3	0.311323	-0.0363349
250	0.3	0.326096	-0.0367099
251	0.3	0.341268	-0.0369925
252	0.3	0.356825	-0.0371779
253	0.3	0.372749	-0.0372623
254	0.3	0.389021	-0.0372425
255	0.3	0.405618	-0.0371167
256	0.3	0.422516	-0.0368837
257	0.3	0.439689	-0.0365435
258	0.3	0.457108	-0.0360972
259	0.3	0.474744	-0.035547
260	0.3	0.492566	-0.0348961
261	0.3	0.51054	-0.0341486
262	0.3	0.528633	-0.0333097
263	0.3	0.546811	-0.0323854
264	0.3	0.565038	-0.0313821
265	0.3	0.583278	-0.0303071
266	0.3	0.601497	-0.0291681
267	0.3	0.619658	-0.027973
268	0.3	0.637727	-0.0267299
269	0.3	0.65567	-0.0254472
270	0.3	0.67345	-0.024133
271	0.3	0.691037	-0.0227952
272	0.3	0.708396	-0.0214419
273	0.3	0.725496	-0.0200804
274	0.3	0.742306	-0.0187181
275	0.3	0.758797	-0.0173618
276	0.3	0.774939	-0.016018
277	0.3	0.790705	-0.0146929
278	0.3	0.806067	-0.0133923
279	0.3	0.821001	-0.0121216
280	0.3	0.83548	-0.0108862
281	0.3	0.84948	-0.00969098
282	0.3	0.862979	-0.00854074
283	0.3	0.875954	-0.00744011
284	0.3	0.888383	-0.00639358
285	0.3	0.900245	-0.00540551
286	0.3	0.911522	-0.00448016
287	0.3	0.922195	-0.00362171
288	0.3	0.932246	-0.00283417
289	0.3	0.941659	-0.00212144
290	0.3	0.950419	-0.0014872
291	0.3	0.958512	-0.000934867
292	0.3	0.965928	-0.000467558
293	0.3	0.972654	-8.79798e-05
294	0.3	0.978683	0.000201629
295	0.3	0.984007	0.000399588
296	0.3	0.988623	0.000504842
297	0.3	0.992528	0.000517034
298	0.3	0.995722	0.000436556
299	0.3	0.998206	0.000264589
300	0.4	0.00202454	-0.000387051
301	0.4	0.00414131	-0.000787885
302	0.4	0.00637707	-0.00120699
303	0.4	0.00873909	-0.00164501
304	0.4	0.0112351	-0.00210259
305	0.4	0.0138733	-0.00258037
306	0.4	0.0166624	-0.00307892
307	0.4	0.0196116	-0.00359879
308	0.4	0.0227307	-0.00414047
309	0.4	0.02603	-0.0047044
310	0.4	0.0295204	-0.0052909
311	0.4	0.0332134	-0.00590019
312	0.4	0.0371211	-0.00653238
313	0.4	0.0412561	-0.00718741
314	0.4	0.0456318	-0.00786505
315	0.4	0.0502621	-0.00856484
316	0.4	0.0551614	-0.00928608
317	0.4	0.0603448	-0.0100278
318	0.4	0.0658279	-0.0107887
319	0.4	0.0716267	-0.0115672
320	0.4	0.0777575	-0.0123611
321	0.4	0.0842372	-0.013168
322	0.4	0.0910826	-0.0139849
323	0.4	0.0983109	-0.0148082
324	0.4	0.105939	-0.015634
325	0.4	0.113983	-0.0164576
326	0.4	0.122461	-0.0172738
327	0.4	0.131387	-0.0180766
328	0.4	0.140776	-0.0188596
329	0.4	0.150642	-0.0196158
330	0.4	0.160997	-0.0203375
331	0.4	0.171851	-0.0210168
332	0.4	0.183213	-0.0216452
333	0.4	0.195088	-0.0222141
334	0.4	0.20748	-0.0227146
335	0.4	0.220388	-0.0231382
336	0.4	0.23381	-0.0234764
337	0.4	0.247738	-0.0237213
338	0.4	0.262161	-0.0238659
339	0.4	0.277066	-0.023904
340	0.4	0.292432	-0.0238308
341	0.4	0.308239	-0.0236427
342	0.4	0.324457	-0.0233379
343	0.4	0.341058	-0.0229164
344	0.4	0.358006	-0.0223801
345	0.4	0.375265	-0.0217327
346	0.4	0.392793	-0.0209799
347	0.4	0.410549	-0.020129
348	0.4	0.428487	-0.0191892
349	0.4	0.446561	-0.0181709
350	0.4	0.464725	-0.0170856
351	0.4	0.482932	-0.0159459
352	0.4	0.501136	-0.0147647
353	0.4	0.519292	-0.0135551
354	0.4	0.537356	-0.0123299
355	0.4	0.555286	-0.0111019
356	0.4	0.573044	-0.0098828
357	0.4	0.590592	-0.00868356
358	0.4	0.607896	-0.00751403
359	0.4	0.624928	-0.0063829
360	0.4	0.641658	-0.00529755
361	0.4	0.658062	-0.00426409
362	0.4	0.67412	-0.00328739
363	0.4	0.689814	-0.00237106
364	0.4	0.705127	-0.00151759
365	0.4	0.720049	-0.000728442
366	0.4	0.73457	-4.12496e-06
367	0.4	0.748681	0.000655647
368	0.4	0.762377	0.00125185
369	0.4	0.775656	0.00178604
370	0.4	0.788516	0.00226022
371	0.4	0.800956	0.00267675
372	0.4	0.812978	0.00303823
373	0.4	0.824585	0.00334745
374	0.4	0.835778	0.00360727
375	0.4	0.846562	0.00382059
376	0.4	0.856942	0.00399029
377	0.4	0.866923	0.00411917
378	0.4	0.87651	0.00420991
379	0.4	0.885709	0.00426507
380	0.4	0.894526	0.00428705
381	0.4	0.902966	0.00427808
382	0.4	0.911037	0.0042402
383	0.4	0.918743	0.00417529
384	0.4	0.926091	0.00408503
385	0.4	0.933088	0.00397094
386	0.4	0.939738	0.00383434
387	0.4	0.94605	0.00367641
388	0.4	0.952028	0.00349819
389	0.4	0.957678	0.00330056
390	0.4	0.963007	0.00308429
391	0.4	0.96802	0.00285002
392	0.4	0.972724	0.00259834
393	0.4	0.977125	0.0023297
394	0.4	0.981228	0.00204453
395	0.4	0.985041	0.00174318
396	0.4	0.98857	0.00142597
397	0.4	0.991821	0.00109318
398	0.4	0.994801	0.000745078
399	0.4	0.997517	0.000381914
400	0.5	0.00247443	-0.000415678
401	0.5	0.00508553	-0.000847458
402	0.5	0.00786917	-0.00130004
403	0.5	0.0108379	-0.00177396
404	0.5	0.014005	-0.00226966
405	0.5	0.017385	-0.00278744
406	0.5	0.0209933	-0.00332746
407	0.5	0.0248464	-0.00388968
408	0.5	0.0289617	-0.00447382
409	0.5	0.0333579	-0.00507931
410	0.5	0.038055	-0.00570523
411	0.5	0.0430739	-0.00635025
412	0.5	0.0484367	-0.00701256
413	0.5	0.0541666	-0.00768978
414	0.5	0.0602879	-0.00837891
415	0.5	0.0668258	-0.00907619
416	0.5	0.0738063	-0.00977706
417	0.5	0.081256	-0.010476
418	0.5	0.0892019	-0.0111667
419	0.5	0.0976711	-0.0118415
420	0.5	0.10669	-0.0124918
421	0.5	0.116286	-0.013108
422	0.5	0.126482	-0.0136791
423	0.5	0.137302	-0.0141934
424	0.5	0.148767	-0.0146381
425	0.5	0.160894	-0.0149998
426	0.5	0.173696	-0.0152648
427	0.5	0.187182	-0.015419
428	0.5	0.201354	-0.0154491
429	0.5	0.216211	-0.0153427
430	0.5	0.231741	-0.0150888
431	0.5	0.247928	-0.0146786
432	0.5	0.264745	-0.0141063
433	0.5	0.282159	-0.0133691
434	0.5	0.300127	-0.0124683
435	0.5	0.318599	-0.0114093
436	0.5	0.337519	-0.0102017
437	0.5	0.356822	-0.00885951
438	0.5	0.376438	-0.00740043
439	0.5	0.396293	-0.00584567
440	0.5	0.416311	-0.00421899
441	0.5	0.436412	-0.00254592
442	0.5	0.456519	-0.000852738
443	0.5	0.476555	0.000834507
444	0.5	0.496446	0.00249094
445	0.5	0.516123	0.00409368
446	0.5	0.535521	0.00562249
447	0.5	0.554583	0.00706028
448	0.5	0.573257	0.00839334
449	0.5	0.5915	0.00961143
450	0.5	0.609273	0.0107077
451	0.5	0.626548	0.0116786
452	0.5	0.6433	0.0125231
453	0.5	0.659513	0.013243
454	0.5	0.675175	0.013842
455	0.5	0.690281	0.0143253
456	0.5	0.70483	0.0146994
457	0.5	0.718825	0.0149718
458	0.5	0.732272	0.0151503
459	0.5	0.745181	0.015243
460	0.5	0.757564	0.0152582
461	0.5	0.769434	0.0152037
462	0.5	0.780808	0.0150874
463	0.5	0.7917	0.0149165
464	0.5	0.80213	0.0146979
465	0.5	0.812114	0.0144379
466	0.5	0.821669	0.0141423
467	0.5	0.830815	0.0138165
468	0.5	0.839569	0.0134653
469	0.5	0.847948	0.0130928
470	0.5	0.855969	0.012703
471	0.5	0.86365	0.0122991
472	0.5	0.871007	0.0118842
473	0.5	0.878055	0.0114608
474	0.5	0.88481	0.0110312
475	0.5	0.891287	0.0105971
476	0.5	0.8975	0.0101604
477	0.5	0.903463	0.00972216
478	0.5	0.90919	0.00928368
479	0.5	0.914693	0.0088458
480	0.5	0.919984	0.00840924
481	0.5	0.925077	0.00797454
482	0.5	0.929984	0.00754208
483	0.5	0.934715	0.00711213
484	0.5	0.939282	0.00668479
485	0.5	0.943698	0.00626011
486	0.5	0.947973	0.00583799
487	0.5	0.952118	0.00541829
488	0.5	0.956146	0.00500075
489	0.5	0.960067	0.00458508
490	0.5	0.963894	0.0041709
491	0.5	0.967638	0.0037578
492	0.5	0.971312	0.00334531
493	0.5	0.97493	0.00293293
494	0.5	0.978505	0.00252014
495	0.5	0.982052	0.00210638
496	0.5	0.985586	0.00169111
497	0.5	0.989125	0.00127377
498	0.5	0.992687	0.00085383
499	0.5	0.996292	0.000430829
500	0.6	0.00295337	-0.000435543
501	0.6	0.00610252	-0.000888471
502	0.6	0.00949552	-0.00136327
503	0.6	0.0131534	-0.00185989
504	0.6	0.017099	-0.00237795
505	0.6	0.0213571	-0.00291667
506	0.6	0.0259547	-0.00347477
507	0.6	0.0309207	-0.00405034
508	0.6	0.0362865	-0.00464072
509	0.6	0.0420856	-0.00524235
510	0.6	0.0483538	-0.0058506
511	0.6	0.0551293	-0.00645955
512	0.6	0.0624522	-0.00706185
513	0.6	0.0703645	-0.00764848
514	0.6	0.07891	-0.00820855
515	0.6	0.0881332	-0.00872914
516	0.6	0.0980791	-0.00919519
517	0.6	0.108793	-0.00958941
518	0.6	0.120317	-0.00989237
519	0.6	0.132692	-0.0100827
520	0.6	0.145954	-0.0101374
521	0.6	0.160134	-0.0100328
522	0.6	0.175253	-0.00974498
523	0.6	0.191326	-0.00925128
524	0.6	0.208351	-0.00853172
525	0.6	0.226318	-0.00757056
526	0.6	0.245197	-0.00635813
527	0.6	0.264944	-0.00489247
528	0.6	0.285497	-0.0031808
529	0.6	0.306776	-0.00124046
530	0.6	0.328685	0.00090074
531	0.6	0.351114	0.00320515
532	0.6	0.37394	0.00562661
533	0.6	0.397031	0.00811274
534	0.6	0.42025	0.0106078
535	0.6	0.443458	0.0130557
536	0.6	0.466519	0.0154035
537	0.6	0.489305	0.017604
538	0.6	0.511698	0.019618
539	0.6	0.533589	0.0214155
540	0.6	0.55489	0.0229767
541	0.6	0.575522	0.0242914
542	0.6	0.595427	0.025358
543	0.6	0.614561	0.0261829
544	0.6	0.632892	0.0267781
545	0.6	0.650406	0.0271603
546	0.6	0.667097	0.0273489
547	0.6	0.682971	0.0273649
548	0.6	0.698042	0.0272299
549	0.6	0.712329	0.026965
550	0.6	0.72586	0.0265903
551	0.6	0.738662	0.0261245
552	0.6	0.750769	0.0255846
553	0.6	0.762214	0.0249857
554	0.6	0.773032	0.0243411
555	0.6	0.783257	0.0236625
556	0.6	0.792924	0.0229599
557	0.6	0.802067	0.0222416
558	0.6	0.810717	0.0215147
559	0.6	0.818906	0.0207851
560	0.6	0.826664	0.0200576
561	0.6	0.834019	0.019336
562	0.6	0.840998	0.0186235
563	0.6	0.847626	0.0179224
564	0.6	0.853928	0.0172346
565	0.6	0.859925	0.0165614
566	0.6	0.86564	0.0159038
567	0.6	0.871091	0.0152623
568	0.6	0.876298	0.0146373
569	0.6	0.881278	0.0140288
570	0.6	0.886047	0.0134367
571	0.6	0.890623	0.0128607
572	0.6	0.895018	0.0123004
573	0.6	0.899249	0.0117553
574	0.6	0.903327	0.0112247
575	0.6	0.907267	0.0107081
576	0.6	0.91108	0.0102046
577	0.6	0.914779	0.00971356
578	0.6	0.918376	0.00923407
579	0.6	0.921882	0.00876533
580	0.6	0.925309	0.00830646
581	0.6	0.928668	0.00785658
582	0.6	0.931971	0.00741481
583	0.6	0.935229	0.00698023
584	0.6	0.938456	0.00655195
585	0.6	0.941662	0.00612904
586	0.6	0.944862	0.00571062
587	0.6	0.948069	0.00529578
588	0.6	0.951298	0.00488367
589	0.6	0.954565	0.00447346
590	0.6	0.957888	0.00406435
591	0.6	0.961285	0.00365565
592	0.6	0.964777	0.00324678
593	0.6	0.968389	0.00283731
594	0.6	0.972149	0.00242703
595	0.6	0.976085	0.00201609
596	0.6	0.980236	0.0016051
597	0.6	0.984642	0.00119534
598	0.6	0.989353	0.000789073
599	0.6	0.994429	0.000389986
600	0.7	0.00345959	-0.000446396
601	0.7	0.00719176	-0.000909632
602	0.7	0.0112612	-0.00139319
603	0.7	0.0157024	-0.00189548
604	0.7	0.0205536	-0.00241403
605	0.7	0.0258567	-0.00294529
606	0.7	0.031658	-0.00348429
607	0.7	0.0380081	-0.00402438
608	0.7	0.0449621	-0.00455684
609	0.7	0.0525797	-0.0050704
610	0.7	0.0609252	-0.00555084
611	0.7	0.0700669	-0.0059805
612	0.7	0.0800767	-0.00633781
613	0.7	0.0910291	-0.0065969
614	0.7	0.103	-0.00672746
615	0.7	0.116064	-0.00669473
616	0.7	0.130292	-0.00646006
617	0.7	0.145751	-0.00598196
618	0.7	0.162493	-0.00521794
619	0.7	0.180559	-0.00412728
620	0.7	0.199968	-0.0026746
621	0.7	0.220714	-0.000834428
622	0.7	0.242762	0.00140394
623	0.7	0.266042	0.00403158
624	0.7	0.29045	0.00701609
625	0.7	0.315842	0.0102996
626	0.7	0.342042	0.0137997
627	0.7	0.368843	0.0174132
628	0.7	0.396016	0.0210239
629	0.7	0.423317	0.0245114
630	0.7	0.450501	0.0277621
631	0.7	0.477332	0.0306783
632	0.7	0.50359	0.0331857
633	0.7	0.529083	0.0352373
634	0.7	0.55365	0.0368138
635	0.7	0.577165	0.0379211
636	0.7	0.599538	0.0385855
637	0.7	0.620711	0.038848
638	0.7	0.64066	0.0387588
639	0.7	0.659382	0.038372
640	0.7	0.6769	0.0377416
641	0.7	0.693251	0.0369187
642	0.7	0.708484	0.0359493
643	0.7	0.722658	0.0348737
644	0.7	0.735835	0.0337264
645	0.7	0.748082	0.0325356
646	0.7	0.759462	0.0313244
647	0.7	0.770042	0.0301109
648	0.7	0.779882	0.0289092
649	0.7	0.789042	0.0277299
650	0.7	0.797577	0.0265808
651	0.7	0.805538	0.0254672
652	0.7	0.812975	0.0243928
653	0.7	0.819931	0.0233597
654	0.7	0.826447	0.0223688
655	0.7	0.832561	0.0214204
656	0.7	0.838306	0.0205139
657	0.7	0.843715	0.0196482
658	0.7	0.848815	0.0188222
659	0.7	0.853632	0.0180341
660	0.7	0.858192	0.0172824
661	0.7	0.862516	0.016565
662	0.7	0.866624	0.0158803
663	0.7	0.870534	0.0152263
664	0.7	0.874264	0.0146011
665	0.7	0.877829	0.014003
666	0.7	0.881244	0.0134301
667	0.7	0.884523	0.0128806
668	0.7	0.887678	0.012353
669	0.7	0.890722	0.0118456
670	0.7	0.893666	0.0113568
671	0.7	0.89652	0.0108851
672	0.7	0.899296	0.0104291
673	0.7	0.902002	0.00998732
674	0.7	0.90465	0.00955847
675	0.7	0.907248	0.00914123
676	0.7	0.909806	0.00873431
677	0.7	0.912333	0.00833649
678	0.7	0.91484	0.00794655
679	0.7	0.917336	0.00756333
680	0.7	0.919831	0.00718567
681	0.7	0.922337	0.00681244
682	0.7	0.924864	0.00644255
683	0.7	0.927425	0.00607491
684	0.7	0.930032	0.00570848
685	0.7	0.9327	0.00534223
686	0.7	0.935446	0.00497521
687	0.7	0.938285	0.00460649
688	0.7	0.94124	0.00423529
689	0.7	0.944331	0.00386092
690	0.7	0.947584	0.00348292
691	0.7	0.951031	0.0031011
692	0.7	0.954707	0.0027157
693	0.7	0.958652	0.00232762
694	0.7	0.962917	0.00193866
695	0.7	0.967564	0.00155206
696	0.7	0.972667	0.00117315
697	0.7	0.978317	0.000810532
698	0.7	0.984634	0.000477815
699	0.7	0.991766	0.000196596
700	0.8	0.00399144	-0.000448041
701	0.8	0.0083533	-0.000909536
702	0.8	0.0131732	-0.0013856
703	0.8	0.0185065	-0.00187131
704	0.8	0.0244156	-0.0023596
705	0.8	0.0309708	-0.00284071
706	0.8	0.0382502	-0.00330138
707	0.8	0.046341	-0.00372401
708	0.8	0.0553394	-0.00408564
709	0.8	0.0653506	-0.00435687
710	0.8	0.076488	-0.0045007
711	0.8	0.0888724	-0.0044716
712	0.8	0.102629	-0.00421494
713	0.8	0.117884	-0.00366715
714	0.8	0.134759	-0.00275719
715	0.8	0.153364	-0.00140992
716	0.8	0.173788	0.000448057
717	0.8	0.196089	0.00287958
718	0.8	0.220278	0.00592517
719	0.8	0.246311	0.00958943
720	0.8	0.274077	0.0138278
721	0.8	0.303388	0.0185367
722	0.8	0.33398	0.0235524
723	0.8	0.365519	0.0286593
724	0.8	0.397615	0.0336116
725	0.8	0.429844	0.0381625
726	0.8	0.461777	0.0420963
727	0.8	0.493004	0.0452549
728	0.8	0.523161	0.0475532
729	0.8	0.551949	0.04898
730	0.8	0.579146	0.0495876
731	0.8	0.604605	0.0494738
732	0.8	0.628253	0.0487616
733	0.8	0.65008	0.0475815
734	0.8	0.670123	0.0460582
735	0.8	0.68846	0.0443022
736	0.8	0.70519	0.0424061
737	0.8	0.720429	0.0404434
738	0.8	0.734298	0.0384705
739	0.8	0.746919	0.0365283
740	0.8	0.758412	0.0346454
741	0.8	0.768886	0.0328405
742	0.8	0.778446	0.0311247
743	0.8	0.787187	0.0295038
744	0.8	0.795194	0.0279793
745	0.8	0.802545	0.0265499
746	0.8	0.809308	0.0252127
747	0.8	0.815547	0.0239633
748	0.8	0.821314	0.0227967
749	0.8	0.82666	0.0217077
750	0.8	0.831628	0.0206909
751	0.8	0.836255	0.019741
752	0.8	0.840576	0.0188528
753	0.8	0.844622	0.0180214
754	0.8	0.84842	0.0172423
755	0.8	0.851993	0.0165111
756	0.8	0.855364	0.0158238
757	0.8	0.858552	0.0151768
758	0.8	0.861575	0.0145667
759	0.8	0.864448	0.0139902
760	0.8	0.867186	0.0134445
761	0.8	0.869802	0.0129268
762	0.8	0.872308	0.0124349
763	0.8	0.874715	0.0119662
764	0.8	0.877034	0.0115188
765	0.8	0.879273	0.0110907
766	0.8	0.881442	0.01068
767	0.8	0.88355	0.0102851
768	0.8	0.885604	0.00990437
769	0.8	0.887612	0.00953626
770	0.8	0.889581	0.0091794
771	0.8	0.89152	0.00883242
772	0.8	0.893435	0.00849406
773	0.8	0.895334	0.00816307
774	0.8	0.897223	0.00783827
775	0.8	0.899111	0.0075185
776	0.8	0.901006	0.00720265
777	0.8	0.902914	0.0068896
778	0.8	0.904846	0.00657827
779	0.8	0.90681	0.00626758
780	0.8	0.908816	0.00595647
781	0.8	0.910875	0.00564385
782	0.8	0.912999	0.00532868
783	0.8	0.915201	0.0050099
784	0.8	0.917496	0.00468646
785	0.8	0.919901	0.00435735
786	0.8	0.922436	0.00402162
787	0.8	0.925123	0.00367838
788	0.8	0.927989	0.00332692
789	0.8	0.931064	0.00296672
790	0.8	0.934385	0.00259768
791	0.8	0.937997	0.00222026
792	0.8	0.941955	0.00183584
793	0.8	0.946325	0.00144726
794	0.8	0.951191	0.00105964
795	0.8	0.95666	0.00068176
796	0.8	0.96287	0.000328377
797	0.8	0.970001	2.41418e-05
798	0.8	0.978298	-0.000189405
799	0.8	0.988095	-0.000240959
800	0.9	0.00454739	-0.000440323
801	0.9	0.00958782	-0.000886604
802	0.9	0.0152405	-0.00133533
803	0.9	0.0215927	-0.00177503
804	0.9	0.0287449	-0.00218939
805	0.9	0.0368122	-0.00255579
806	0.9	0.0459257	-0.00284333
807	0.9	0.0562339	-0.00301061
808	0.9	0.0679029	-0.00300319
809	0.9	0.0811155	-0.00275103
810	0.9	0.0960692	-0.0021664
811	0.9	0.112971	-0.00114323
812	0.9	0.132027	0.00044077
813	0.9	0.153432	0.00271714
814	0.9	0.177347	0.00581248
815	0.9	0.203877	0.00982531
816	0.9	0.233041	0.0147938
817	0.9	0.264741	0.0206589
818	0.9	0.298739	0.0272322
819	0.9	0.334639	0.0341846
820	0.9	0.371897	0.0410689
821	0.9	0.409844	0.0473834
822	0.9	0.447746	0.0526623
823	0.9	0.484866	0.056565
824	0.9	0.520533	0.0589329
825	0.9	0.554204	0.059796
826	0.9	0.585491	0.0593347
827	0.9	0.614171	0.0578176
828	0.9	0.640172	0.0555401
829	0.9	0.663544	0.0527778
830	0.9	0.684422	0.0497605
831	0.9	0.702997	0.0466639
832	0.9	0.719486	0.0436119
833	0.9	0.734113	0.0406851
834	0.9	0.747096	0.0379311
835	0.9	0.758637	0.0353732
836	0.9	0.76892	0.0330186
837	0.9	0.778107	0.0308636
838	0.9	0.786341	0.0288986
839	0.9	0.793747	0.0271103
840	0.9	0.800432	0.025484
841	0.9	0.806488	0.0240047
842	0.9	0.811996	0.0226581
843	0.9	0.817023	0.0214303
844	0.9	0.821627	0.0203091
845	0.9	0.825861	0.019283
846	0.9	0.829766	0.0183418
847	0.9	0.833381	0.0174764
848	0.9	0.836739	0.0166788
849	0.9	0.839869	0.0159416
850	0.9	0.842793	0.0152587
851	0.9	0.845536	0.0146242
852	0.9	0.848116	0.0140331
853	0.9	0.850549	0.0134811
854	0.9	0.852851	0.0129641
855	0.9	0.855035	0.0124786
856	0.9	0.857114	0.0120215
857	0.9	0.859097	0.0115898
858	0.9	0.860996	0.0111811
859	0.9	0.862818	0.0107931
860	0.9	0.864572	0.0104236
861	0.9	0.866265	0.0100708
862	0.9	0.867905	0.00973296
863	0.9	0.869498	0.00940844
864	0.9	0.87105	0.00909579
865	0.9	0.872567	0.00879365
866	0.9	0.874056	0.00850074
867	0.9	0.87552	0.00821586
868	0.9	0.876967	0.00793787
869	0.9	0.8784	0.00766569
870	0.9	0.879826	0.00739829
871	0.9	0.881251	0.00713465
872	0.9	0.882679	0.00687378
873	0.9	0.884116	0.00661472
874	0.9	0.885569	0.00635651
875	0.9	0.887045	0.00609819
876	0.9	0.888549	0.00583878
877	0.9	0.890091	0.00557731
878	0.9	0.891676	0.00531277
879	0.9	0.893316	0.00504413
880	0.9	0.89502	0.00477032
881	0.9	0.896799	0.00449024
882	0.9	0.898665	0.00420276
883	0.9	0.900635	0.00390669
884	0.9	0.902724	0.00360081
885	0.9	0.904952	0.00328391
886	0.9	0.907342	0.00295474
887	0.9	0.909923	0.00261214
888	0.9	0.912726	0.00225506
889	0.9	0.915791	0.00188271
890	0.9	0.919168	0.00149478
891	0.9	0.922917	0.00109178
892	0.9	0.927114	0.000675598
893	0.9	0.931858	0.000250533
894	0.9	0.937274	-0.000175048
895	0.9	0.943531	-0.000585705
896	0.9	0.950856	-0.000953481
897	0.9	0.959566	-0.00122758
898	0.9	0.970116	-0.00131387
899	0.9	0.983179	-0.00103177
900	1	0.00512602	-0.000423112
901	1	0.0108966	-0.000839015
902	1	0.0174747	-0.00123593
903	1	0.0249953	-0.00159029
904	1	0.0336175	-0.00186816
905	1	0.0435279	-0.00202144
906	1	0.0549441	-0.00198324
907	1	0.0681164	-0.00166231
908	1	0.0833287	-0.000937202
909	1	0.100894	0.000348455
910	1	0.121147	0.00238678
911	1	0.144421	0.00539771
912	1	0.171022	0.00960507
913	1	0.201177	0.0151889
914	1	0.234979	0.0222101
915	1	0.272308	0.0305156
916	1	0.312774	0.0396589
917	1	0.355679	0.0488876
918	1	0.40003	0.057252
919	1	0.444628	0.0638298
920	1	0.488214	0.0679826
921	1	0.529632	0.0695183
922	1	0.567983	0.0686834
923	1	0.602699	0.0660137
924	1	0.633545	0.0621417
925	1	0.660571	0.0576447
926	1	0.684019	0.0529676
927	1	0.704245	0.0484096
928	1	0.721648	0.0441456
929	1	0.736624	0.0402596
930	1	0.749538	0.0367761
931	1	0.760713	0.0336844
932	1	0.770428	0.0309555
933	1	0.778917	0.0285522
934	1	0.786375	0.0264359
935	1	0.792965	0.0245695
936	1	0.798819	0.0229194
937	1	0.80405	0.0214558
938	1	0.808749	0.0201529
939	1	0.812992	0.0189884
940	1	0.816841	0.0179434
941	1	0.820351	0.0170017
942	1	0.823565	0.0161496
943	1	0.826521	0.0153754
944	1	0.82925	0.0146692
945	1	0.831781	0.0140225
946	1	0.834135	0.0134281
947	1	0.836334	0.0128796
948	1	0.838394	0.0123717
949	1	0.840331	0.0118998
950	1	0.842158	0.0114599
951	1	0.843886	0.0110483
952	1	0.845526	0.0106621
953	1	0.847087	0.0102984
954	1	0.848577	0.00995494
955	1	0.850003	0.00962949
956	1	0.851374	0.00932017
957	1	0.852693	0.00902526
958	1	0.853968	0.00874319
959	1	0.855204	0.00847257
960	1	0.856405	0.00821209
961	1	0.857576	0.00796058
962	1	0.858721	0.00771693
963	1	0.859845	0.00748011
964	1	0.860952	0.00724915
965	1	0.862046	0.00702314
966	1	0.863131	0.00680119
967	1	0.86421	0.00658246
968	1	0.865289	0.00636612
969	1	0.86637	0.00615136
970	1	0.867459	0.00593738
971	1	0.86856	0.00572337
972	1	0.869677	0.00550851
973	1	0.870816	0.00529197
974	1	0.871982	0.0050729
975	1	0.873181	0.00485041
976	1	0.874418	0.00462357
977	1	0.875703	0.0043914
978	1	0.877041	0.00415286
979	1	0.878443	0.00390684
980	1	0.879918	0.00365215
981	1	0.881479	0.00338752
982	1	0.883137	0.00311156
983	1	0.88491	0.00282277
984	1	0.886815	0.00251956
985	1	0.888874	0.00220018
986	1	0.891114	0.00186281
987	1	0.893565	0.00150554
988	1	0.896266	0.00112645
989	1	0.899265	0.000723737
990	1	0.902622	0.000295938
991	1	0.906412	-0.000157638
992	1	0.910734	-0.000636151
993	1	0.915718	-0.00113583
994	1	0.921538	-0.00164735
995	1	0.928435	-0.00215077
996	1	0.936751	-0.00260543
997	1	0.946989	-0.00292869
998	1	0.959918	-0.00294813
999	1	0.97678	-0.00228514

## Sheet: Figure 1H
outcrossing rate	0	0.01	0.02	0.03	0.04	0.05	0.06	0.07	0.08	0.09	0.1	0.11	0.12	0.13	0.14	0.15	0.16	0.17	0.18	0.19	0.2	0.21	0.22	0.23	0.24	0.25	0.26	0.27	0.28	0.29	0.3	0.31	0.32	0.33	0.34	0.35	0.36	0.37	0.38	0.39	0.4	0.41	0.42	0.43	0.44	0.45	0.46	0.47	0.48
0	0.666667	8.67733e-05	3.40064e-09	1.20097e-13	3.81423e-18	1.08697e-22	2.77313e-27	6.31886e-32	1.28281e-36	2.31445e-41	3.70137e-46	5.23287e-51	6.52185e-56	7.14506e-61	6.86045e-66	5.75537e-71	4.20515e-76	2.66713e-81	1.46343e-86	6.92194e-92	2.81196e-97	9.77367e-103	2.89503e-108	7.27788e-114	1.54617e-119	2.7636e-125	4.13668e-131	5.16055e-137	5.33864e-143	4.55605e-149	3.19011e-155	1.82228e-161	8.44206e-168	3.15222e-174	9.4257e-181	2.24185e-187	4.2114e-194	6.2024e-201	7.10629e-208	6.28271e-215	4.24983e-222	2.17988e-229	8.39943e-237	2.40731e-244	5.07886e-252	7.80187e-260	8.62625e-268	6.78193e-276	3.74299e-284
0.01	0.999963	0.0007273	9.05167e-09	2.86929e-13	9.5654e-18	3.03042e-22	8.85622e-27	2.3569e-31	5.67078e-36	1.22753e-40	2.38152e-45	4.12754e-50	6.3716e-55	8.73556e-60	1.06075e-64	1.13768e-69	1.07477e-74	8.91827e-80	6.48174e-85	4.11433e-90	2.2742e-95	1.09139e-100	4.5335e-106	1.62492e-111	5.00954e-117	1.32411e-122	2.99071e-128	5.75296e-134	9.39272e-140	1.29709e-145	1.50974e-151	1.47587e-157	1.20742e-163	8.23729e-170	4.6695e-176	2.19169e-182	8.48775e-189	2.70292e-195	7.05459e-202	1.50436e-208	2.61344e-215	3.68905e-222	4.22161e-229	3.9095e-236	2.92623e-243	1.76934e-250	8.64533e-258	3.41843e-265	1.09678e-272
0.02	1	0.999915	4.40139e-08	8.06302e-13	2.56507e-17	8.69322e-22	2.84903e-26	8.72821e-31	2.46045e-35	6.3255e-40	1.47442e-44	3.10255e-49	5.87307e-54	9.97116e-59	1.51413e-63	2.05114e-68	2.47262e-73	2.64606e-78	2.50771e-83	2.09972e-88	1.54959e-93	1.00559e-98	5.72453e-104	2.85197e-109	1.24053e-114	4.69997e-120	1.54735e-125	4.41641e-131	1.09027e-136	2.32268e-142	4.26061e-148	6.71491e-154	9.07383e-160	1.04922e-165	1.03624e-171	8.72663e-178	6.25701e-184	3.81478e-190	1.97569e-196	8.68599e-203	3.24067e-209	1.02618e-215	2.75971e-222	6.31098e-229	1.22958e-235	2.04657e-242	2.92062e-249	3.59026e-256	3.82388e-263
0.03	1	1	0.948738	3.27109e-12	7.75746e-17	2.62275e-21	9.33949e-26	3.2326e-30	1.05341e-34	3.1811e-39	8.82017e-44	2.23179e-48	5.1308e-53	1.06795e-57	2.00669e-62	3.39504e-67	5.15969e-72	7.0284e-77	8.56314e-82	9.31269e-87	9.02259e-92	7.77268e-97	5.9427e-102	4.0251e-107	2.41088e-112	1.27476e-117	5.94023e-123	2.43556e-128	8.77287e-134	2.77201e-139	7.67301e-145	1.85826e-150	3.93306e-156	7.26799e-162	1.17169e-167	1.64688e-173	2.01748e-179	2.15381e-185	2.00421e-191	1.6265e-197	1.15223e-203	7.13492e-210	3.86907e-216	1.84175e-222	7.71895e-229	2.85879e-235	9.39756e-242	2.75623e-248	7.25646e-255
0.04	1	1	1	5.43739e-11	2.99754e-16	8.65581e-21	3.17578e-25	1.20941e-29	4.48021e-34	1.56935e-38	5.1212e-43	1.54303e-47	4.26718e-52	1.07845e-56	2.48249e-61	5.19049e-66	9.834e-71	1.68475e-75	2.60488e-80	3.6284e-85	4.54556e-90	5.11351e-95	5.15772e-100	4.65782e-105	3.76104e-110	2.71193e-115	1.74412e-120	9.99349e-126	5.0964e-131	2.31111e-136	9.31205e-142	3.33161e-147	1.05786e-152	2.98e-158	7.44656e-164	1.6507e-169	3.24699e-175	5.67058e-181	8.79977e-187	1.21482e-192	1.49416e-198	1.64038e-204	1.61121e-210	1.41977e-216	1.12604e-222	8.06858e-229	5.24618e-235	3.11061e-241	1.69137e-247
0.05	1	1	1	1	2.2665e-15	3.39355e-20	1.15437e-24	4.63885e-29	1.90971e-33	7.64253e-38	2.90067e-42	1.03005e-46	3.39373e-51	1.03161e-55	2.88132e-60	7.37126e-65	1.72289e-69	3.67118e-74	7.11834e-79	1.25389e-83	2.00353e-88	2.90004e-93	3.79786e-98	4.49474e-103	4.80229e-108	4.62762e-113	4.01848e-118	3.14222e-123	2.21108e-128	1.39938e-133	7.96272e-139	4.07256e-144	1.87201e-149	7.7341e-155	2.8726e-160	9.59616e-166	2.88509e-171	7.81359e-177	1.9084e-182	4.20954e-188	8.4004e-194	1.5197e-199	2.49834e-205	3.74273e-211	5.12562e-217	6.43999e-223	7.45343e-229	7.98198e-235	7.94887e-241
0.06	1	1	1	1	1	1.97968e-19	4.75281e-24	1.86802e-28	8.26173e-33	3.70346e-37	1.61225e-41	6.67218e-46	2.59305e-50	9.3912e-55	3.153e-59	9.77611e-64	2.79117e-68	7.3211e-73	1.76078e-77	3.87675e-82	7.80289e-87	1.43396e-91	2.4035e-96	3.67081e-101	5.10423e-106	6.45708e-111	7.42701e-116	7.76332e-121	7.37172e-126	6.35718e-131	4.97824e-136	3.54e-141	2.28618e-146	1.34132e-151	7.15277e-157	3.46914e-162	1.5316e-167	6.16176e-173	2.26185e-178	7.58723e-184	2.32992e-189	6.56345e-195	1.7001e-200	4.05991e-206	8.96494e-212	1.83654e-217	3.5031e-223	6.24652e-229	1.04579e-234
0.07	1	1	1	1	1	5.53597e-18	2.53965e-23	8.24127e-28	3.69817e-32	1.80543e-36	8.85869e-41	4.21779e-45	1.91293e-49	8.17476e-54	3.26869e-58	1.21703e-62	4.20477e-67	1.34444e-71	3.97e-76	1.08083e-80	2.70915e-85	6.24466e-90	1.32238e-94	2.57048e-99	4.58331e-104	7.49209e-109	1.12226e-113	1.53993e-118	1.93525e-123	2.22722e-128	2.34742e-133	2.26619e-138	2.00451e-143	1.62526e-148	1.20866e-153	8.25068e-159	5.17472e-164	2.98529e-169	1.58623e-174	7.77481e-180	3.52141e-185	1.47674e-190	5.74665e-196	2.08024e-201	7.02397e-207	2.21877e-212	6.57825e-218	1.83698e-223	4.84999e-229
0.08	1	1	1	1	1	1	2.82398e-22	4.35746e-27	1.76963e-31	8.99778e-36	4.8587e-40	2.61992e-44	1.37009e-48	6.83816e-53	3.22586e-57	1.42926e-61	5.92151e-66	2.28675e-70	8.21158e-75	2.73682e-79	8.45341e-84	2.41695e-88	6.39046e-93	1.5613e-97	3.52259e-102	7.33582e-107	1.40959e-111	2.49862e-116	4.08529e-121	6.16121e-126	8.57219e-131	1.10056e-135	1.30438e-140	1.42787e-145	1.44466e-150	1.35202e-155	1.17156e-160	9.41035e-166	7.01567e-171	4.8618e-176	3.13698e-181	1.88807e-186	1.06219e-191	5.59814e-197	2.77082e-202	1.29138e-207	5.68369e-213	2.36963e-218	9.38942e-224
0.09	1	1	1	1	1	1	1	3.54051e-26	9.64163e-31	4.70415e-35	2.6967e-39	1.61317e-43	9.58913e-48	5.52683e-52	3.04591e-56	1.59129e-60	7.83586e-65	3.62239e-69	1.56753e-73	6.33593e-78	2.38811e-82	8.38279e-87	2.73763e-91	8.31133e-96	2.34431e-100	6.14069e-105	1.49329e-109	3.37073e-114	7.06213e-119	1.37345e-123	2.47991e-128	4.15857e-133	6.47926e-138	9.38478e-143	1.26456e-147	1.58645e-152	1.85481e-157	2.0232e-162	2.0615e-167	1.9649e-172	1.75461e-177	1.47045e-182	1.15868e-187	8.6021e-193	6.03021e-198	4.00112e-203	2.51918e-208	1.5092e-213	8.62772e-219
0.1	1	1	1	1	1	1	1	1.75702e-24	6.95121e-30	2.70293e-34	1.54681e-38	9.96409e-43	6.61119e-47	4.34293e-51	2.76644e-55	1.68815e-59	9.79272e-64	5.37232e-68	2.77725e-72	1.34935e-76	6.14955e-81	2.62503e-85	1.04836e-89	3.91386e-94	1.36503e-98	4.4456e-103	1.35157e-107	3.83532e-112	1.0158e-116	2.51129e-121	5.7965e-126	1.24955e-130	2.51684e-135	4.7393e-140	8.34876e-145	1.37697e-149	2.12824e-154	3.08576e-159	4.202e-164	5.38106e-169	6.4896e-174	7.38221e-179	7.93439e-184	8.07233e-189	7.78938e-194	7.14407e-199	6.24178e-204	5.20752e-209	4.15923e-214
0.11	1	1	1	1	1	1	1	1	1.14108e-28	1.88512e-33	9.50291e-38	6.2833e-42	4.53778e-46	3.34276e-50	2.43144e-54	1.71556e-58	1.16172e-62	7.49825e-67	4.59163e-71	2.65889e-75	1.45255e-79	7.47313e-84	3.61617e-88	1.64418e-92	7.0194e-97	2.81244e-101	1.0572e-105	3.72778e-110	1.23295e-114	3.82542e-119	1.11364e-123	3.04283e-128	7.80663e-133	1.88164e-137	4.26359e-142	9.08879e-147	1.82433e-151	3.45135e-156	6.16072e-161	1.03885e-165	1.65698e-170	2.5035e-175	3.58849e-180	4.88797e-185	6.33824e-190	7.83883e-195	9.26501e-200	1.04875e-204	1.13944e-209
0.12	1	1	1	1	1	1	1	1	1	2.11989e-32	6.70667e-37	4.16158e-41	3.14765e-45	2.54441e-49	2.08256e-53	1.67987e-57	1.31516e-61	9.89983e-66	7.12118e-70	4.87452e-74	3.16579e-78	1.94658e-82	1.13142e-86	6.20927e-91	3.21483e-95	1.56936e-99	7.22048e-104	3.13035e-108	1.27871e-112	4.92183e-117	1.7854e-121	6.1055e-126	1.96904e-130	5.99175e-135	1.72137e-139	4.6722e-144	1.19905e-148	2.91216e-153	6.70009e-158	1.46187e-162	3.02844e-167	5.96444e-172	1.11831e-176	1.99915e-181	3.41276e-186	5.57279e-191	8.72003e-196	1.30994e-200	1.8929e-205
0.13	1	1	1	1	1	1	1	1	1	2.35189e-30	6.45447e-36	3.04912e-40	2.2583e-44	1.94049e-48	1.75357e-52	1.59561e-56	1.42898e-60	1.24298e-64	1.04143e-68	8.35856e-73	6.40213e-77	4.66707e-81	3.23186e-85	2.12295e-89	1.3215e-93	7.78969e-98	4.346e-102	2.29428e-106	1.14586e-110	5.41439e-115	2.42076e-119	1.02434e-123	4.10373e-128	1.55721e-132	5.5999e-137	1.90966e-141	6.18002e-146	1.89947e-150	5.54977e-155	1.54294e-159	4.0862e-164	1.03203e-168	2.48891e-173	5.73916e-178	1.26714e-182	2.68279e-187	5.45531e-192	1.06719e-196	2.01189e-201
0.14	1	1	1	1	1	1	1	1	1	1	1.65082e-34	2.76838e-39	1.74417e-43	1.51186e-47	1.46853e-51	1.48211e-55	1.49979e-59	1.49249e-63	1.44377e-67	1.34765e-71	1.20781e-75	1.03581e-79	8.47932e-84	6.6143e-88	4.91022e-92	3.46596e-96	2.32477e-100	1.48115e-104	8.96149e-109	5.1487e-113	2.80917e-117	1.45578e-121	7.1677e-126	3.35423e-130	1.49259e-134	6.31934e-139	2.54721e-143	9.78224e-148	3.58215e-152	1.25189e-156	4.17956e-161	1.33439e-165	4.07864e-170	1.19492e-174	3.35975e-179	9.07808e-184	2.36053e-188	5.91548e-193	1.43086e-197
0.15	1	1	1	1	1	1	1	1	1	1	1	4.38785e-38	1.57122e-42	1.24228e-46	1.24363e-50	1.36045e-54	1.53213e-58	1.72451e-62	1.90792e-66	2.0538e-70	2.13696e-74	2.13963e-78	2.05509e-82	1.88937e-86	1.65999e-90	1.39222e-94	1.11371e-98	8.49313e-103	6.17234e-107	4.27414e-111	2.82004e-115	1.77303e-119	1.06249e-123	6.07039e-128	3.30802e-132	1.72025e-136	8.54155e-141	4.05213e-145	1.83801e-149	7.97757e-154	3.31613e-158	1.32139e-162	5.05252e-167	1.85575e-171	6.55474e-176	2.2291e-180	7.30772e-185	2.31247e-189	7.07296e-194
0.16	1	1	1	1	1	1	1	1	1	1	1	2.31017e-35	2.0275e-41	1.14262e-45	1.09316e-49	1.25208e-53	1.53808e-57	1.93134e-61	2.41792e-65	2.97483e-69	3.56459e-73	4.13541e-77	4.62632e-81	4.9766e-85	5.13729e-89	5.08177e-93	4.81202e-97	4.35877e-101	3.77502e-105	3.12517e-109	2.47273e-113	1.86998e-117	1.3518e-121	9.34339e-126	6.17674e-130	3.90712e-134	2.36597e-138	1.37234e-142	7.62946e-147	4.06826e-151	2.08228e-155	1.02388e-159	4.84079e-164	2.20271e-168	9.65613e-173	4.08238e-177	1.66635e-181	6.57448e-186	2.51027e-190
0.17	1	1	1	1	1	1	1	1	1	1	1	1	9.31523e-40	1.34728e-44	1.04437e-48	1.18098e-52	1.53697e-56	2.11509e-60	2.95889e-64	4.11947e-68	5.6363e-72	7.51815e-76	9.72482e-80	1.21538e-83	1.46382e-87	1.6959e-91	1.88748e-95	2.01618e-99	2.06566e-103	2.02906e-107	1.91045e-111	1.72404e-115	1.49123e-119	1.23651e-123	9.83137e-128	7.49789e-132	5.48722e-136	3.85535e-140	2.60205e-144	1.68799e-148	1.05324e-152	6.32554e-157	3.65954e-161	2.04116e-165	1.09859e-169	5.7109e-174	2.87019e-178	1.39604e-182	6.57853e-187
0.18	1	1	1	1	1	1	1	1	1	1	1	1	1	3.1871e-43	1.19342e-47	1.18433e-51	1.55779e-55	2.29143e-59	3.52538e-63	5.48991e-67	8.49673e-71	1.29255e-74	1.91889e-78	2.76671e-82	3.86138e-86	5.20426e-90	6.76205e-94	8.46011e-98	1.01831e-101	1.17853e-105	1.31099e-109	1.4014e-113	1.4395e-117	1.42093e-121	1.34808e-125	1.22956e-129	1.0785e-133	9.10125e-138	7.39259e-142	5.78279e-146	4.35891e-150	3.16809e-154	2.22176e-158	1.50451e-162	9.8454e-167	6.23119e-171	3.81754e-175	2.26602e-179	1.30443e-183
0.19	1	1	1	1	1	1	1	1	1	1	1	1	1	1	2.12291e-46	1.35593e-50	1.65048e-54	2.49639e-58	4.13299e-62	7.096e-66	1.229e-69	2.11342e-73	3.57315e-77	5.90143e-81	9.47993e-85	1.47662e-88	2.22537e-92	3.23991e-96	4.55169e-100	6.16571e-104	8.04884e-108	1.01223e-111	1.22615e-115	1.43058e-119	1.60772e-123	1.74067e-127	1.81608e-131	1.82644e-135	1.77131e-139	1.6573e-143	1.49673e-147	1.30545e-151	1.10031e-155	8.96784e-160	7.0726e-164	5.40138e-168	3.99758e-172	2.86948e-176	1.99934e-180
0.2	1	1	1	1	1	1	1	1	1	1	1	1	1	1	2.58746e-44	2.10537e-49	1.93145e-53	2.80513e-57	4.83743e-61	8.98298e-65	1.71831e-68	3.30677e-72	6.31392e-76	1.18572e-79	2.17737e-83	3.8942e-87	6.76427e-91	1.13886e-94	1.85582e-98	2.92399e-102	4.45113e-106	6.54345e-110	9.28654e-114	1.27217e-117	1.68215e-121	2.14707e-125	2.64582e-129	3.14854e-133	3.61932e-137	4.02044e-141	4.31751e-145	4.48447e-149	4.50748e-153	4.38676e-157	4.13623e-161	3.78088e-165	3.35275e-169	2.88625e-173	2.41386e-177
0.21	1	1	1	1	1	1	1	1	1	1	1	1	1	1	1	8.56604e-48	2.81753e-52	3.3974e-56	5.77699e-60	1.12839e-63	2.34338e-67	4.98621e-71	1.06513e-74	2.25638e-78	4.7032e-82	9.59519e-86	1.90901e-89	3.69431e-93	6.94099e-97	1.26442e-100	2.23112e-104	3.81086e-108	6.29786e-112	1.00672e-115	1.55637e-119	2.32697e-123	3.36489e-127	4.70677e-131	6.37008e-135	8.34373e-139	1.05808e-142	1.29956e-146	1.54661e-150	1.78435e-154	1.99676e-158	2.16848e-162	2.28678e-166	2.34318e-170	2.3344e-174
0.22	1	1	1	1	1	1	1	1	1	1	1	1	1	1	1	1	7.42985e-51	4.85084e-55	7.29841e-59	1.43343e-62	3.15458e-66	7.30777e-70	1.72704e-73	4.09064e-77	9.60555e-81	2.22034e-84	5.02796e-88	1.11169e-91	2.39416e-95	5.0136e-99	1.0196e-102	2.01186e-106	3.84928e-110	7.13823e-114	1.28266e-117	2.23298e-121	3.76617e-125	6.15438e-129	9.74537e-133	1.49566e-136	2.22539e-140	3.21112e-144	4.49511e-148	6.10713e-152	8.05635e-156	1.03241e-159	1.28589e-163	1.55749e-167	1.83553e-171
0.23	1	1	1	1	1	1	1	1	1	1	1	1	1	1	1	1	1.53861e-47	1.03552e-53	1.04534e-57	1.89834e-61	4.26293e-65	1.05245e-68	2.7133e-72	7.11138e-76	1.86553e-79	4.85079e-83	1.2422e-86	3.11908e-90	7.65543e-94	1.83254e-97	4.27147e-101	9.68339e-105	2.13323e-108	4.56397e-112	9.47913e-116	1.91074e-119	3.73754e-123	7.09428e-127	1.30675e-130	2.3361e-134	4.05408e-138	6.83122e-142	1.11799e-145	1.77769e-149	2.74736e-153	4.12849e-157	6.03499e-161	8.58564e-165	1.1893e-168
0.24	1	1	1	1	1	1	1	1	1	1	1	1	1	1	1	1	1	1.07925e-51	2.00136e-56	2.76991e-60	5.93565e-64	1.5121e-67	4.17256e-71	1.19462e-74	3.46722e-78	1.00616e-81	2.89382e-85	8.20075e-89	2.28061e-92	6.20604e-96	1.64907e-99	4.27237e-103	1.078e-106	2.6469e-110	6.32092e-114	1.46748e-117	3.31139e-121	7.2616e-125	1.54748e-128	3.20483e-132	6.45095e-136	1.26227e-139	2.40155e-143	4.44376e-147	7.99955e-151	1.40147e-154	2.39036e-158	3.97081e-162	6.4271e-166
0.25	1	1	1	1	1	1	1	1	1	1	1	1	1	1	1	1	1	1	9.39191e-55	5.02578e-59	8.9113e-63	2.21726e-66	6.36773e-70	1.95771e-73	6.21208e-77	1.99361e-80	6.3916e-84	2.03093e-87	6.36156e-91	1.95698e-94	5.8966e-98	1.73684e-101	4.99389e-105	1.40018e-108	3.82526e-112	1.01773e-115	2.63591e-119	6.64431e-123	1.62979e-126	3.89009e-130	9.03529e-134	2.04232e-137	4.49332e-141	9.62409e-145	2.00726e-148	4.07773e-152	8.07117e-156	1.55705e-159	2.9287e-163
0.26	1	1	1	1	1	1	1	1	1	1	1	1	1	1	1	1	1	1	1	1.64107e-57	1.58303e-61	3.44733e-65	9.84028e-69	3.16951e-72	1.08259e-75	3.80006e-79	1.34648e-82	4.76304e-86	1.66995e-89	5.77441e-93	1.9624e-96	6.5381e-100	2.13159e-103	6.79134e-107	2.11238e-110	6.40966e-114	1.89632e-117	5.46819e-121	1.53647e-124	4.2062e-128	1.12181e-131	2.91489e-135	7.37951e-139	1.82051e-142	4.37718e-146	1.02594e-149	2.34467e-153	5.22629e-157	1.13654e-160
0.27	1	1	1	1	1	1	1	1	1	1	1	1	1	1	1	1	1	1	1	3.68187e-54	4.26907e-60	6.11924e-64	1.59106e-67	5.16215e-71	1.85672e-74	7.02767e-78	2.72384e-81	1.06401e-84	4.14721e-88	1.60228e-91	6.10806e-95	2.29003e-98	8.42425e-102	3.03541e-105	1.0699e-108	3.68546e-112	1.23981e-115	4.07109e-119	1.30437e-122	4.07676e-126	1.24278e-129	3.69497e-133	1.07143e-136	3.03024e-140	8.35987e-144	2.25006e-147	5.9094e-151	1.51474e-154	3.7904e-158
0.28	1	1	1	1	1	1	1	1	1	1	1	1	1	1	1	1	1	1	1	1	6.37573e-58	1.48442e-62	2.85977e-66	8.70298e-70	3.18588e-73	1.27482e-76	5.33431e-80	2.27888e-83	9.79913e-87	4.20265e-90	1.78681e-93	7.49904e-97	3.09732e-100	1.25619e-103	4.99461e-107	1.94441e-110	7.40488e-114	2.75672e-117	1.00275e-120	3.56258e-124	1.23595e-127	4.18631e-131	1.38429e-134	4.4687e-138	1.40835e-141	4.33364e-145	1.30216e-148	3.82128e-152	1.0954e-155
0.29	1	1	1	1	1	1	1	1	1	1	1	1	1	1	1	1	1	1	1	1	1	9.91319e-61	6.54949e-65	1.59804e-68	5.60924e-72	2.30284e-75	1.02178e-78	4.71618e-82	2.21696e-85	1.04778e-88	4.93759e-92	2.30694e-95	1.06442e-98	4.8362e-102	2.15922e-105	9.45828e-109	4.06012e-112	1.70645e-115	7.01754e-119	2.82229e-122	1.10965e-125	4.26415e-129	1.60128e-132	5.87566e-136	2.10662e-139	7.38013e-143	2.52651e-146	8.45278e-150	2.76414e-153
0.3	1	1	1	1	1	1	1	1	1	1	1	1	1	1	1	1	1	1	1	1	1	1	2.97854e-63	3.55923e-67	1.0585e-70	4.23765e-74	1.94131e-77	9.5231e-81	4.83849e-84	2.49843e-87	1.2959e-90	6.70039e-94	3.43534e-97	1.74008e-100	8.68412e-104	4.26161e-107	2.05336e-110	9.70299e-114	4.4929e-117	2.03725e-120	9.04172e-124	3.92635e-127	1.66782e-130	6.92881e-134	2.81496e-137	1.11834e-140	4.34472e-144	1.65067e-147	6.13338e-151
0.31	1	1	1	1	1	1	1	1	1	1	1	1	1	1	1	1	1	1	1	1	1	1	1	1.30878e-65	2.33711e-69	8.25147e-73	3.73469e-76	1.90091e-79	1.02818e-82	5.73903e-86	3.24985e-89	1.84716e-92	1.04637e-95	5.87867e-99	3.26412e-102	1.78664e-105	9.62204e-109	5.09136e-112	2.64401e-115	1.34647e-118	6.71978e-122	3.28498e-125	1.57244e-128	7.36834e-132	3.37939e-135	1.51681e-138	6.66234e-142	2.86363e-145	1.20452e-148
0.32	1	1	1	1	1	1	1	1	1	1	1	1	1	1	1	1	1	1	1	1	1	1	1	6.3839e-63	7.58548e-68	1.8295e-71	7.52408e-75	3.82265e-78	2.15366e-81	1.28127e-84	7.84185e-88	4.86186e-91	3.02361e-94	1.87381e-97	1.15189e-100	7.00077e-104	4.1964e-107	2.47636e-110	1.43667e-113	8.18564e-117	4.57663e-120	2.50938e-123	1.34869e-126	7.10268e-130	3.66426e-133	1.85149e-136	9.16164e-140	4.43927e-143	2.10632e-146
0.33	1	1	1	1	1	1	1	1	1	1	1	1	1	1	1	1	1	1	1	1	1	1	1	1	1.06264e-65	5.51336e-70	1.6901e-73	7.98213e-77	4.52534e-80	2.81269e-83	1.83629e-86	1.23008e-89	8.33643e-93	5.66411e-96	3.83458e-99	2.5755e-102	1.71082e-105	1.12134e-108	7.23947e-112	4.59763e-115	2.86929e-118	1.75827e-121	1.05731e-124	6.23617e-128	3.60644e-131	2.0444e-134	1.13579e-137	6.18314e-141	3.29813e-144
0.34	1	1	1	1	1	1	1	1	1	1	1	1	1	1	1	1	1	1	1	1	1	1	1	1	1	4.44841e-68	4.88111e-72	1.82781e-75	9.80457e-79	6.17177e-82	4.21929e-85	3.0163e-88	2.20758e-91	1.63281e-94	1.21023e-97	8.93731e-101	6.54902e-104	4.74771e-107	3.39756e-110	2.39606e-113	1.6631e-116	1.135e-119	7.61011e-123	5.01009e-126	3.2371e-129	2.05194e-132	1.27571e-135	7.77725e-139	4.64866e-142
0.35	1	1	1	1	1	1	1	1	1	1	1	1	1	1	1	1	1	1	1	1	1	1	1	1	1	1	2.90893e-70	5.16564e-74	2.2988e-77	1.38825e-80	9.66101e-84	7.24483e-87	5.65971e-90	4.5179e-93	3.6413e-96	2.93986e-99	2.36475e-102	1.88778e-105	1.49137e-108	1.16351e-111	8.94948e-115	6.7784e-118	5.05053e-121	3.69912e-124	2.66165e-127	1.88058e-130	1.30426e-133	8.87656e-137	5.92708e-140
0.36	1	1	1	1	1	1	1	1	1	1	1	1	1	1	1	1	1	1	1	1	1	1	1	1	1	1	1	2.56508e-72	6.44917e-76	3.34317e-79	2.25665e-82	1.72962e-85	1.4192e-88	1.2092e-91	1.05103e-94	9.2166e-98	8.0936e-101	7.08103e-104	6.14938e-107	5.28644e-110	4.48955e-113	3.7607e-116	3.10338e-119	2.52052e-122	2.01329e-125	1.58063e-128	1.21915e-131	9.23484e-135	6.86786e-138
0.37	1	1	1	1	1	1	1	1	1	1	1	1	1	1	1	1	1	1	1	1	1	1	1	1	1	1	1	4.60474e-69	2.85583e-74	9.40518e-78	5.59417e-81	4.1954e-84	3.52964e-87	3.16152e-90	2.93244e-93	2.7709e-96	2.63971e-99	2.51767e-102	2.39238e-105	2.25691e-108	2.10822e-111	1.94615e-114	1.77269e-117	1.59138e-120	1.40668e-123	1.22341e-126	1.0463e-129	8.79517e-133	7.26395e-136
0.38	1	1	1	1	1	1	1	1	1	1	1	1	1	1	1	1	1	1	1	1	1	1	1	1	1	1	1	1	9.87386e-72	3.87334e-76	1.58977e-79	1.07226e-82	8.88882e-86	8.18377e-89	7.98445e-92	8.04792e-95	8.25395e-98	8.52973e-101	8.82329e-104	9.09335e-107	9.30562e-110	9.4319e-113	9.45046e-116	9.34682e-119	9.11441e-122	8.75489e-125	8.27779e-128	7.69956e-131	7.04212e-134
0.39	1	1	1	1	1	1	1	1	1	1	1	1	1	1	1	1	1	1	1	1	1	1	1	1	1	1	1	1	1	6.64568e-74	6.25994e-78	3.09483e-81	2.34475e-84	2.13905e-87	2.14922e-90	2.27932e-93	2.49231e-96	2.77011e-99	3.10083e-102	3.47387e-105	3.87763e-108	4.29854e-111	4.72083e-114	5.12684e-117	5.49778e-120	5.81486e-123	6.06057e-126	6.22012e-129	6.28264e-132
0.4	1	1	1	1	1	1	1	1	1	1	1	1	1	1	1	1	1	1	1	1	1	1	1	1	1	1	1	1	1	1	7.29252e-76	1.18769e-79	6.90128e-83	5.82796e-86	5.82804e-89	6.37423e-92	7.33391e-95	8.68506e-98	1.04455e-100	1.26473e-103	1.53241e-106	1.85008e-109	2.21863e-112	2.6365e-115	3.09907e-118	3.59817e-121	4.12189e-124	4.65467e-127	5.17784e-130
0.41	1	1	1	1	1	1	1	1	1	1	1	1	1	1	1	1	1	1	1	1	1	1	1	1	1	1	1	1	1	1	1	1.0907e-77	2.61693e-81	1.75461e-84	1.64085e-87	1.79243e-90	2.12894e-93	2.65245e-96	3.39646e-99	4.41372e-102	5.77242e-105	7.55407e-108	9.85096e-111	1.27622e-113	1.63881e-116	2.08214e-119	2.6138e-122	3.23848e-125	3.95669e-128
0.42	1	1	1	1	1	1	1	1	1	1	1	1	1	1	1	1	1	1	1	1	1	1	1	1	1	1	1	1	1	1	1	1	2.06081e-79	6.64132e-83	5.06513e-86	5.21634e-89	6.20493e-92	7.98569e-95	1.07547e-97	1.48677e-100	2.08459e-103	2.94076e-106	4.15098e-109	5.83921e-112	8.16177e-115	1.13101e-117	1.55113e-120	2.1025e-123	2.8136e-126
0.43	1	1	1	1	1	1	1	1	1	1	1	1	1	1	1	1	1	1	1	1	1	1	1	1	1	1	1	1	1	1	1	1	1	4.72673e-81	1.92856e-84	1.65406e-87	1.86685e-90	2.41115e-93	3.35541e-96	4.87629e-99	7.26678e-102	1.09776e-104	1.66822e-107	2.53654e-110	3.84404e-113	5.78946e-116	8.64647e-119	1.27835e-121	1.86849e-124
0.44	1	1	1	1	1	1	1	1	1	1	1	1	1	1	1	1	1	1	1	1	1	1	1	1	1	1	1	1	1	1	1	1	1	8.59003e-77	1.285e-82	6.37358e-86	6.08976e-89	7.5003e-92	1.04901e-94	1.57538e-97	2.46644e-100	3.95632e-103	6.4306e-106	1.0513e-108	1.71971e-111	2.80409e-114	4.54478e-117	7.30601e-120	1.16297e-122
0.45	1	1	1	1	1	1	1	1	1	1	1	1	1	1	1	1	1	1	1	1	1	1	1	1	1	1	1	1	1	1	1	1	1	1	2.65016e-79	4.0762e-84	2.38626e-87	2.52e-90	3.37387e-93	5.09725e-96	8.24514e-99	1.38845e-101	2.39385e-104	4.18087e-107	7.3437e-110	1.29073e-112	2.26164e-115	3.93981e-118	6.8088e-121
0.46	1	1	1	1	1	1	1	1	1	1	1	1	1	1	1	1	1	1	1	1	1	1	1	1	1	1	1	1	1	1	1	1	1	1	1	3.48846e-81	1.49224e-85	1.00816e-88	1.16876e-91	1.69502e-94	2.75975e-97	4.79954e-100	8.67972e-103	1.60623e-105	3.01035e-108	5.674e-111	1.0702e-113	2.01268e-116	3.76385e-119
0.47	1	1	1	1	1	1	1	1	1	1	1	1	1	1	1	1	1	1	1	1	1	1	1	1	1	1	1	1	1	1	1	1	1	1	1	1	7.90817e-83	6.25348e-87	4.78987e-90	6.05944e-93	9.48853e-96	1.66116e-98	3.10062e-101	6.01272e-104	1.19265e-106	2.39554e-109	4.83906e-112	9.78297e-115	1.97234e-117
0.48	1	1	1	1	1	1	1	1	1	1	1	1	1	1	1	1	1	1	1	1	1	1	1	1	1	1	1	1	1	1	1	1	1	1	1	1	1	2.48866e-84	2.98132e-88	2.55144e-91	3.50329e-94	5.90525e-97	1.10929e-99	2.21842e-102	4.6062e-105	9.78011e-108	2.10264e-110	4.54655e-113	9.84031e-116
0.49	1	1	1	1	1	1	1	1	1	1	1	1	1	1	1	1	1	1	1	1	1	1	1	1	1	1	1	1	1	1	1	1	1	1	1	1	1	1	9.9804e-86	1.60909e-89	1.51965e-92	2.25362e-95	4.07742e-98	8.20137e-101	1.7544e-103	3.89472e-106	8.84024e-109	2.03179e-111	4.69718e-114
0.5	1	1	1	1	1	1	1	1	1	1	1	1	1	1	1	1	1	1	1	1	1	1	1	1	1	1	1	1	1	1	1	1	1	1	1	1	1	1	1	4.8904e-87	9.79382e-91	1.00962e-93	1.60969e-96	3.11737e-99	6.70057e-102	1.53069e-104	3.628e-107	8.79183e-110	2.15754e-112
0.51	1	1	1	1	1	1	1	1	1	1	1	1	1	1	1	1	1	1	1	1	1	1	1	1	1	1	1	1	1	1	1	1	1	1	1	1	1	1	1	1	2.86151e-88	6.70177e-92	7.46631e-95	1.27417e-97	2.63417e-100	6.03856e-103	1.47077e-105	3.71663e-108	9.6035e-111
0.52	1	1	1	1	1	1	1	1	1	1	1	1	1	1	1	1	1	1	1	1	1	1	1	1	1	1	1	1	1	1	1	1	1	1	1	1	1	1	1	1	1	1.97431e-89	5.14338e-93	6.13445e-96	1.11576e-98	2.45585e-101	5.99251e-104	1.55369e-106	4.18013e-109
0.53	1	1	1	1	1	1	1	1	1	1	1	1	1	1	1	1	1	1	1	1	1	1	1	1	1	1	1	1	1	1	1	1	1	1	1	1	1	1	1	1	1	1	1.59671e-90	4.41931e-94	5.59065e-97	1.07914e-99	2.52212e-102	6.53791e-105	1.80156e-107
0.54	1	1	1	1	1	1	1	1	1	1	1	1	1	1	1	1	1	1	1	1	1	1	1	1	1	1	1	1	1	1	1	1	1	1	1	1	1	1	1	1	1	1	1	1.51297e-91	4.2462e-95	5.6438e-98	1.1511e-100	2.84895e-103	7.83012e-106
0.55	1	1	1	1	1	1	1	1	1	1	1	1	1	1	1	1	1	1	1	1	1	1	1	1	1	1	1	1	1	1	1	1	1	1	1	1	1	1	1	1	1	1	1	1	1.68871e-92	4.56e-96	6.30414e-99	1.35244e-101	3.53481e-104
0.56	1	1	1	1	1	1	1	1	1	1	1	1	1	1	1	1	1	1	1	1	1	1	1	1	1	1	1	1	1	1	1	1	1	1	1	1	1	1	1	1	1	1	1	1	1	2.24968e-93	5.47463e-97	7.78533e-100	1.7483e-102
0.57	1	1	1	1	1	1	1	1	1	1	1	1	1	1	1	1	1	1	1	1	1	1	1	1	1	1	1	1	1	1	1	1	1	1	1	1	1	1	1	1	1	1	1	1	1	1	3.67227e-94	7.35678e-98	1.06249e-100
0.58	1	1	1	1	1	1	1	1	1	1	1	1	1	1	1	1	1	1	1	1	1	1	1	1	1	1	1	1	1	1	1	1	1	1	1	1	1	1	1	1	1	1	1	1	1	0.999974	0.99721	7.74073e-95	1.10922e-98
0.59	1	1	1	1	1	1	1	1	1	1	1	1	1	1	1	1	1	1	1	1	1	1	1	1	1	1	1	1	1	1	1	1	1	1	1	1	1	1	1	1	1	1	1	1	0.999998	0.999267	0.993034	0.985713	2.37006e-95
0.6	1	1	1	1	1	1	1	1	1	1	1	1	1	1	1	1	1	1	1	1	1	1	1	1	1	1	1	1	1	1	1	1	1	1	1	1	1	1	1	1	1	1	1	1	0.999899	0.995939	0.988797	0.981646	0.974538
0.61	1	1	1	1	1	1	1	1	1	1	1	1	1	1	1	1	1	1	1	1	1	1	1	1	1	1	1	1	1	1	1	1	1	1	1	1	1	1	1	1	1	1	1	0.999989	0.998311	0.991672	0.984653	0.977671	0.970728
0.62	1	1	1	1	1	1	1	1	1	1	1	1	1	1	1	1	1	1	1	1	1	1	1	1	1	1	1	1	1	1	1	1	1	1	1	1	1	1	1	1	1	1	0.999999	0.999577	0.994331	0.987455	0.980602	0.973783	0.967001
0.63	1	1	1	1	1	1	1	1	1	1	1	1	1	1	1	1	1	1	1	1	1	1	1	1	1	1	1	1	1	1	1	1	1	1	1	1	1	1	1	1	1	1	0.999927	0.996713	0.990056	0.983333	0.976641	0.96998	0.963354
0.64	1	1	1	1	1	1	1	1	1	1	1	1	1	1	1	1	1	1	1	1	1	1	1	1	1	1	1	1	1	1	1	1	1	1	1	1	1	1	1	1	1	0.999989	0.998554	0.992457	0.985867	0.979302	0.972765	0.966259	0.959783
0.65	1	1	1	1	1	1	1	1	1	1	1	1	1	1	1	1	1	1	1	1	1	1	1	1	1	1	1	1	1	1	1	1	1	1	1	1	1	1	1	1	0.999998	0.999546	0.994651	0.988206	0.98177	0.975359	0.968973	0.962615	0.956286
0.66	1	1	1	1	1	1	1	1	1	1	1	1	1	1	1	1	1	1	1	1	1	1	1	1	1	1	1	1	1	1	1	1	1	1	1	1	1	1	1	1	0.999885	0.996594	0.990354	0.984048	0.977763	0.9715	0.965261	0.959048	0.952861
0.67	1	1	1	1	1	1	1	1	1	1	1	1	1	1	1	1	1	1	1	1	1	1	1	1	1	1	1	1	1	1	1	1	1	1	1	1	1	1	1	0.999972	0.998151	0.992312	0.986138	0.979981	0.973842	0.967724	0.961627	0.955554	0.949504
0.68	1	1	1	1	1	1	1	1	1	1	1	1	1	1	1	1	1	1	1	1	1	1	1	1	1	1	1	1	1	1	1	1	1	1	1	1	1	1	0.999993	0.999163	0.994082	0.988045	0.982015	0.976001	0.970004	0.964026	0.958067	0.95213	0.946215
0.69	1	1	1	1	1	1	1	1	1	1	1	1	1	1	1	1	1	1	1	1	1	1	1	1	1	1	1	1	1	1	1	1	1	1	1	1	1	0.999998	0.999667	0.995649	0.989771	0.983869	0.97798	0.972106	0.966246	0.960404	0.95458	0.948774	0.94299
0.7	1	1	1	1	1	1	1	1	1	1	1	1	1	1	1	1	1	1	1	1	1	1	1	1	1	1	1	1	1	1	1	1	1	1	1	1	0.999999	0.999872	0.996982	0.991321	0.985547	0.979783	0.974031	0.968292	0.962566	0.956856	0.951162	0.945485	0.939827
0.71	1	1	1	1	1	1	1	1	1	1	1	1	1	1	1	1	1	1	1	1	1	1	1	1	1	1	1	1	1	1	1	1	1	1	1	1	0.999948	0.998032	0.992697	0.987052	0.981414	0.975784	0.970165	0.964557	0.958961	0.953379	0.947811	0.94226	0.936725
0.72	1	1	1	1	1	1	1	1	1	1	1	1	1	1	1	1	1	1	1	1	1	1	1	1	1	1	1	1	1	1	1	1	1	1	1	0.999977	0.998775	0.993902	0.988389	0.982875	0.977368	0.971869	0.966378	0.960898	0.955428	0.949971	0.944526	0.939096	0.933681
0.73	1	1	1	1	1	1	1	1	1	1	1	1	1	1	1	1	1	1	1	1	1	1	1	1	1	1	1	1	1	1	1	1	1	1	0.999988	0.999249	0.994935	0.989561	0.984171	0.978786	0.973407	0.968034	0.962669	0.957312	0.951965	0.946629	0.941304	0.935992	0.930694
0.74	1	1	1	1	1	1	1	1	1	1	1	1	1	1	1	1	1	1	1	1	1	1	1	1	1	1	1	1	1	1	1	1	1	0.999993	0.999527	0.995797	0.990572	0.985306	0.980043	0.974783	0.969527	0.964278	0.959034	0.953798	0.94857	0.943352	0.938143	0.932946	0.927761
0.75	1	1	1	1	1	1	1	1	1	1	1	1	1	1	1	1	1	1	1	1	1	1	1	1	1	1	1	1	1	1	1	1	0.999996	0.999684	0.99649	0.991427	0.986284	0.981141	0.976	0.970862	0.965727	0.960597	0.955471	0.950352	0.94524	0.940137	0.935042	0.929956	0.924882
0.76	1	1	1	1	1	1	1	1	1	1	1	1	1	1	1	1	1	1	1	1	1	1	1	1	1	1	1	1	1	1	1	0.999997	0.999771	0.997019	0.992129	0.987108	0.982086	0.977063	0.972041	0.967021	0.962003	0.956989	0.951978	0.946973	0.941974	0.936982	0.931997	0.927021	0.922055
0.77	1	1	1	1	1	1	1	1	1	1	1	1	1	1	1	1	1	1	1	1	1	1	1	1	1	1	1	1	1	1	0.999997	0.999817	0.997399	0.992684	0.987784	0.98288	0.977975	0.973068	0.968162	0.963257	0.958353	0.953451	0.948553	0.943659	0.938769	0.933886	0.929008	0.924139	0.919277
0.78	1	1	1	1	1	1	1	1	1	1	1	1	1	1	1	1	1	1	1	1	1	1	1	1	1	1	1	1	1	0.999997	0.999838	0.997643	0.993095	0.988316	0.983529	0.978739	0.973948	0.969155	0.964361	0.959567	0.954774	0.949982	0.945193	0.940407	0.935624	0.930846	0.926074	0.921307	0.916548
0.79	1	1	1	1	1	1	1	1	1	1	1	1	1	1	1	1	1	1	1	1	1	1	1	1	1	1	1	1	0.999997	0.999841	0.997769	0.993368	0.988707	0.984036	0.979362	0.974684	0.970003	0.96532	0.960635	0.95595	0.951264	0.94658	0.941896	0.937215	0.932537	0.927862	0.923191	0.918526	0.913866
0.8	1	1	1	1	1	1	1	1	1	1	1	1	1	1	1	1	1	1	1	1	1	1	1	1	1	1	1	0.999996	0.999828	0.997785	0.993506	0.988962	0.984406	0.979845	0.975279	0.97071	0.966136	0.96156	0.956982	0.952403	0.947822	0.943241	0.938661	0.934082	0.929505	0.924931	0.920359	0.915792	0.91123
0.81	1	1	1	1	1	1	1	1	1	1	1	1	1	1	1	1	1	1	1	1	1	1	1	1	1	1	0.999995	0.999795	0.997697	0.993515	0.989085	0.984642	0.980194	0.975739	0.971279	0.966815	0.962346	0.957875	0.9534	0.948923	0.944444	0.939965	0.935485	0.931006	0.926528	0.922051	0.917577	0.913106	0.908639
0.82	1	1	1	1	1	1	1	1	1	1	1	1	1	1	1	1	1	1	1	1	1	1	1	1	1	0.999992	0.999736	0.997505	0.993399	0.989081	0.98475	0.980412	0.976067	0.971716	0.967359	0.962997	0.95863	0.95426	0.949886	0.945509	0.94113	0.936749	0.932367	0.927985	0.923603	0.919222	0.914842	0.910465	0.906091
0.83	1	1	1	1	1	1	1	1	1	1	1	1	1	1	1	1	1	1	1	1	1	1	1	1	0.999987	0.999635	0.997204	0.993162	0.988953	0.984732	0.980503	0.976266	0.972022	0.967772	0.963515	0.959253	0.954986	0.950714	0.946438	0.942159	0.937876	0.933592	0.929305	0.925018	0.92073	0.916442	0.912154	0.907869	0.903585
0.84	1	1	1	1	1	1	1	1	1	1	1	1	1	1	1	1	1	1	1	1	1	1	0.999999	0.999975	0.999469	0.996789	0.992808	0.988707	0.984594	0.980472	0.976342	0.972204	0.968058	0.963906	0.959747	0.955582	0.951411	0.947235	0.943055	0.93887	0.934682	0.930491	0.926298	0.922103	0.917906	0.913709	0.909512	0.905315	0.901119
0.85	1	1	1	1	1	1	1	1	1	1	1	1	1	1	1	1	1	1	1	1	1	0.999998	0.999952	0.999202	0.996256	0.99234	0.988345	0.984339	0.980323	0.976297	0.972264	0.968222	0.964172	0.960115	0.95605	0.95198	0.947903	0.943821	0.939733	0.935641	0.931545	0.927446	0.923343	0.919238	0.915131	0.911022	0.906913	0.902803	0.898694
0.86	1	1	1	1	1	1	1	1	1	1	1	1	1	1	1	1	1	1	1	1	0.999996	0.9999	0.998795	0.995605	0.991764	0.987873	0.983971	0.980059	0.976137	0.972206	0.968266	0.964317	0.96036	0.956396	0.952424	0.948446	0.94446	0.940469	0.936473	0.932471	0.928464	0.924454	0.920439	0.916422	0.912402	0.90838	0.904357	0.900332	0.896307
0.87	1	1	1	1	1	1	1	1	1	1	1	1	1	1	1	1	1	1	1	0.99999	0.999787	0.998209	0.99484	0.991083	0.987294	0.983495	0.979684	0.975864	0.972034	0.968194	0.964345	0.960488	0.956622	0.952748	0.948866	0.944977	0.941081	0.937179	0.93327	0.929356	0.925437	0.921514	0.917586	0.913654	0.909719	0.905782	0.901842	0.897901	0.893958
0.88	1	1	1	1	1	1	1	1	1	1	1	1	1	1	1	1	1	0.999999	0.999971	0.999552	0.99743	0.993967	0.9903	0.986613	0.982913	0.979203	0.975483	0.971752	0.968011	0.964261	0.960501	0.956732	0.952954	0.949168	0.945374	0.941572	0.937763	0.933947	0.930125	0.926297	0.922463	0.918624	0.914781	0.910933	0.907081	0.903226	0.899368	0.895508	0.891646
0.89	1	1	1	1	1	1	1	1	1	1	1	1	1	1	1	1	0.999996	0.999916	0.999103	0.99647	0.992994	0.989421	0.985832	0.982231	0.97862	0.974997	0.971364	0.96772	0.964066	0.960402	0.956729	0.953046	0.949354	0.945654	0.941945	0.938229	0.934505	0.930773	0.927035	0.923291	0.91954	0.915784	0.912022	0.908256	0.904486	0.900711	0.896933	0.893152	0.889369
0.9	1	1	1	1	1	1	1	1	1	1	1	1	1	1	0.999999	0.999984	0.999767	0.998358	0.99536	0.991926	0.988448	0.984956	0.981452	0.977937	0.974411	0.970873	0.967325	0.963766	0.960196	0.956617	0.953028	0.949429	0.945821	0.942204	0.938579	0.934946	0.931304	0.927655	0.923999	0.920336	0.916667	0.912991	0.90931	0.905624	0.901932	0.898236	0.894537	0.890833	0.887127
0.91	1	1	1	1	1	1	1	1	1	1	1	1	1	0.999996	0.999943	0.9994	0.997305	0.994131	0.99077	0.987386	0.983989	0.98058	0.977159	0.973727	0.970283	0.966829	0.963363	0.959887	0.9564	0.952903	0.949396	0.945879	0.942353	0.938817	0.935273	0.931721	0.92816	0.924591	0.921015	0.917432	0.913842	0.910245	0.906642	0.903034	0.89942	0.895801	0.892178	0.88855	0.884919
0.92	1	1	1	1	1	1	1	1	1	1	1	0.999999	0.999984	0.999804	0.998662	0.996009	0.992805	0.989529	0.986238	0.982934	0.979618	0.97629	0.97295	0.969599	0.966236	0.962862	0.959476	0.95608	0.952674	0.949257	0.94583	0.942393	0.938947	0.935491	0.932026	0.928552	0.92507	0.92158	0.918082	0.914576	0.911064	0.907544	0.904018	0.900485	0.896947	0.893404	0.889855	0.886302	0.882744
0.93	1	1	1	1	1	1	1	1	1	1	0.999995	0.999933	0.999405	0.997495	0.994552	0.991395	0.988208	0.985008	0.981795	0.97857	0.975332	0.972083	0.968822	0.965549	0.962265	0.958969	0.955663	0.952345	0.949017	0.945678	0.942329	0.93897	0.935602	0.932223	0.928836	0.925439	0.922034	0.91862	0.915198	0.911769	0.908331	0.904887	0.901435	0.897977	0.894513	0.891043	0.887568	0.884087	0.880602
0.94	1	1	1	1	1	1	1	1	0.999998	0.999974	0.999736	0.998529	0.996	0.99299	0.989908	0.98681	0.983699	0.980575	0.977439	0.97429	0.97113	0.967957	0.964773	0.961577	0.958369	0.95515	0.95192	0.948679	0.945427	0.942164	0.938892	0.935608	0.932316	0.929013	0.925701	0.922379	0.919049	0.91571	0.912362	0.909007	0.905643	0.902272	0.898894	0.895509	0.892117	0.888719	0.885315	0.881906	0.878491
0.95	1	1	1	1	1	1	0.999999	0.999988	0.999872	0.999151	0.997129	0.994319	0.991348	0.98835	0.985339	0.982315	0.979278	0.976229	0.973167	0.970093	0.967007	0.963909	0.9608	0.957678	0.954545	0.951401	0.948246	0.945079	0.941902	0.938713	0.935515	0.932306	0.929087	0.925858	0.922619	0.919371	0.916114	0.912848	0.909573	0.90629	0.902999	0.8997	0.896393	0.893079	0.889758	0.88643	0.883096	0.879756	0.87641
0.96	1	1	1	1	0.999999	0.999993	0.999929	0.999486	0.99794	0.995386	0.992536	0.989638	0.986724	0.983798	0.980858	0.977907	0.974942	0.971966	0.968977	0.965976	0.962963	0.959938	0.956901	0.953853	0.950792	0.947721	0.944638	0.941544	0.938439	0.935324	0.932198	0.929061	0.925914	0.922757	0.919591	0.916414	0.913229	0.910034	0.90683	0.903618	0.900397	0.897168	0.893931	0.890686	0.887434	0.884176	0.88091	0.877638	0.87436
0.97	1	1	1	0.999995	0.999953	0.999657	0.998472	0.996195	0.993479	0.990681	0.987864	0.985033	0.982189	0.979333	0.976465	0.973584	0.97069	0.967785	0.964867	0.961936	0.958994	0.95604	0.953074	0.950097	0.947108	0.944107	0.941096	0.938073	0.935039	0.931994	0.928938	0.925872	0.922796	0.919709	0.916613	0.913506	0.91039	0.907265	0.904131	0.900987	0.897835	0.894675	0.891507	0.88833	0.885146	0.881955	0.878756	0.875551	0.872339
0.98	1	0.999996	0.999963	0.99974	0.998791	0.996764	0.994188	0.99149	0.988767	0.98603	0.98328	0.980518	0.977743	0.974955	0.972155	0.969343	0.966519	0.963682	0.960833	0.957972	0.955099	0.952214	0.949318	0.94641	0.94349	0.940558	0.937616	0.934662	0.931697	0.928721	0.925735	0.922738	0.91973	0.916712	0.913684	0.910646	0.907598	0.904541	0.901475	0.898399	0.895314	0.892221	0.889119	0.88601	0.882892	0.879766	0.876633	0.873493	0.870346
0.99	0.999966	0.999773	0.998954	0.997115	0.994672	0.992073	0.989442	0.986797	0.984139	0.981468	0.978785	0.976089	0.973381	0.970661	0.967928	0.965183	0.962426	0.959656	0.956875	0.954081	0.951276	0.948458	0.945629	0.942789	0.939936	0.937072	0.934197	0.931311	0.928414	0.925505	0.922586	0.919656	0.916716	0.913765	0.910804	0.907833	0.904852	0.901861	0.898861	0.895851	0.892832	0.889805	0.886768	0.883724	0.880671	0.87761	0.874541	0.871465	0.868381
1	0.999	0.997275	0.994944	0.99244	0.9899	0.987344	0.984775	0.982194	0.979601	0.976995	0.974376	0.971746	0.969103	0.966447	0.96378	0.9611	0.958409	0.955705	0.952989	0.950261	0.947521	0.94477	0.942007	0.939232	0.936446	0.933648	0.930839	0.928018	0.925187	0.922344	0.91949	0.916626	0.913751	0.910866	0.90797	0.905064	0.902149	0.899223	0.896287	0.893342	0.890388	0.887425	0.884453	0.881472	0.878482	0.875484	0.872478	0.869465	0.866444
[truncated: 52 more columns]
