# Supplementary material for: A toxin-antidote selfish element increases fitness of its host
Source: eLife. 2023 Oct 24;12:e81640. doi: 10.7554/eLife.81640 (PMC10629817; doi:10.7554/eLife.81640)
Supplement: Figure 2—source data 1. [file elife-81640-fig2-data1.xlsx]

## Sheet: figure 2A
competition (xPTM229)	fitness
N2	0.013
N2	0
N2	-0.019
CX12311	0.425
CX12311	0.326
CX12311	0.235
CX12311	0.183
CX12311	0.08
QX1198	0.274
QX1198	0.268
QX1198	0.243
QX1198	0.23
QX1198	0.23

## Sheet: figure 2A DNA
competition (xPTM229)	replicate	transfer	dpy-10 barcode allele DNA concentration (copied/ul)	dpy-10 WT DNA concentration (copied/ul)	ratio
N2	1	1	739	872	0.458721
N2	1	3	520	605	0.462222
N2	1	5	648	735	0.468547
N2	1	7	461	515	0.472336
N2	2	1	392	421	0.482165
N2	2	3	740	798	0.481144
N2	2	5	432	465	0.481605
N2	2	7	814	874	0.482227
N2	3	1	231	347	0.399654
N2	3	3	270	419	0.391872
N2	3	5	350	558	0.385463
N2	3	7	523	852	0.380364
CX12311	1	1	685	377	0.645009
CX12311	1	3	237	72	0.76699
CX12311	1	5	585	98	0.856515
CX12311	1	7	307	28	0.916418
CX12311	2	1	543	373	0.592795
CX12311	2	3	641	280	0.695983
CX12311	2	5	186	51	0.78481
CX12311	2	7	467	82	0.850638
CX12311	3	1	467	549	0.459646
CX12311	3	3	181	153	0.541916
CX12311	3	5	474	289	0.621232
CX12311	3	7	869	385	0.692982
CX12311	4	1	126	109	0.53617
CX12311	4	3	416	281	0.596844
CX12311	4	5	562	296	0.655012
CX12311	4	7	169	68	0.71308
CX12311	5	1	810	855	0.486486
CX12311	5	3	817	766	0.516109
CX12311	5	5	594	501	0.542466
CX12311	5	7	809	611	0.569718
QX1198	1	1	238	393	0.377179
QX1198	1	3	462	524	0.46856
QX1198	1	5	162	125	0.56446
QX1198	1	7	478	253	0.653899
QX1198	2	1	547	296	0.648873
QX1198	2	3	362	135	0.72837
QX1198	2	5	181	46	0.797357
QX1198	2	7	836	148	0.849593
QX1198	3	1	196	250	0.439462
QX1198	3	3	677	616	0.523589
QX1198	3	5	743	482	0.606531
QX1198	3	7	323	150	0.682875
QX1198	4	1	108	115	0.484305
QX1198	4	3	875	682	0.561978
QX1198	4	5	417	237	0.637615
QX1198	4	7	899	371	0.707874
QX1198	5	1	534	442	0.547131
QX1198	5	3	807	485	0.624613
QX1198	5	5	477	209	0.695335
QX1198	5	7	510	162	0.758929

## Sheet: figure 2B
strain	fecundity (no. eggs per worm)
N2	346.833
N2	370
N2	363.167
N2	349
N2	328.333
QX1198	322.4
QX1198	335.667
QX1198	314.667
QX1198	307.5
QX1198	325.5

## Sheet: figure 2C
strain	size (microns)
N2	1273
N2	1552
N2	1266
N2	1123
N2	1388
N2	1290
N2	1351
N2	1288
N2	1264
N2	1317
N2	1400
N2	1312
N2	1155
N2	1240
N2	1207
N2	1200
N2	1296
N2	1239
N2	1310
N2	1375
N2	1369
N2	1327
N2	1258
N2	1300
N2	1392
N2	1257
N2	1251
N2	1470
N2	1254
N2	1312
N2	1374
N2	1164
N2	1168
N2	1384
N2	1292
N2	1254
N2	1288
N2	1282
N2	1421
N2	1155
N2	1420
N2	1240
N2	1440
N2	1412
N2	1294
N2	1350
N2	1255
N2	1185
N2	1268
N2	1316
N2	1385
N2	1345
N2	1231
N2	1251
N2	1280
N2	1282
N2	1276
N2	1074
N2	1212
N2	1289
QX1198	1212
QX1198	1287
QX1198	1175
QX1198	1215
QX1198	1119
QX1198	1147
QX1198	1273
QX1198	1116
QX1198	1274
QX1198	1223
QX1198	1124
QX1198	1219
QX1198	1131
QX1198	1219
QX1198	1225
QX1198	1164
QX1198	1158
QX1198	1360
QX1198	1071
QX1198	1130
QX1198	970
QX1198	1250
QX1198	1210
QX1198	1216
QX1198	1150
QX1198	1248
QX1198	1192
QX1198	1194
QX1198	1167
QX1198	1167
QX1198	1186
QX1198	965
QX1198	1177
QX1198	1058
QX1198	1068
QX1198	1151
QX1198	1247
QX1198	1133
QX1198	1155
QX1198	1130
QX1198	1187
QX1198	1255
QX1198	1207
QX1198	1134
QX1198	1252
QX1198	1238
QX1198	1323
QX1198	1101
QX1198	1072
QX1198	1055
QX1198	1271
QX1198	1260
QX1198	1052
QX1198	1175
QX1198	1243
QX1198	1146
QX1198	1165
QX1198	1325
QX1198	1328
QX1198	1413
