# Supplementary material for: A toxin-antidote selfish element increases fitness of its host
Source: eLife. 2023 Oct 24;12:e81640. doi: 10.7554/eLife.81640 (PMC10629817; doi:10.7554/eLife.81640)
Supplement: Figure 3—source data 1. [file elife-81640-fig3-data1.xlsx]

## Sheet: figure 3B
cross	embryo lethality (%)
N2xCB4856	29.7
N2xCB4856	25.8
N2xCB4856	23.9
N2xCB4856	18.1
N2xCB4856	14.2
PTM377xCB4856	0
PTM377xCB4856	0
PTM377xCB4856	0
PTM377xCB4856	0
PTM377xCB4856	0
PTM377xCB4856	0
PTM377xCB4856	0
N2xN2	0
N2xN2	0
N2xN2	0
N2xN2	0
N2xN2	0
N2xN2	0
N2xN2	0
N2xN2	0

## Sheet: figure 3C
strain	fecundity (no. eggs per worm)
N2	346.833
N2	370
N2	363.167
N2	349
N2	328.333
PTM377	321.833
PTM377	350.133
PTM377	325.567
PTM377	328.3
PTM377	327

## Sheet: figure 3D
strain	size (microns)
N2	1273
N2	1552
N2	1266
N2	1123
N2	1388
N2	1290
N2	1351
N2	1288
N2	1264
N2	1317
N2	1400
N2	1312
N2	1155
N2	1240
N2	1207
N2	1200
N2	1296
N2	1239
N2	1310
N2	1375
N2	1369
N2	1327
N2	1258
N2	1300
N2	1392
N2	1257
N2	1251
N2	1470
N2	1254
N2	1312
N2	1374
N2	1164
N2	1168
N2	1384
N2	1292
N2	1254
N2	1288
N2	1282
N2	1421
N2	1155
N2	1420
N2	1240
N2	1440
N2	1412
N2	1294
N2	1350
N2	1255
N2	1185
N2	1268
N2	1316
N2	1385
N2	1345
N2	1231
N2	1251
N2	1280
N2	1282
N2	1276
N2	1074
N2	1212
N2	1289
PTM377	1243
PTM377	1278
PTM377	1160
PTM377	1201
PTM377	1155
PTM377	1188
PTM377	1305
PTM377	1114
PTM377	1119
PTM377	1327
PTM377	1151
PTM377	1289
PTM377	1038
PTM377	1490
PTM377	1161
PTM377	1282
PTM377	1156
PTM377	1250
PTM377	1201
PTM377	1292
PTM377	1261
PTM377	1234
PTM377	1346
PTM377	1422
PTM377	1333
PTM377	1241
PTM377	1145
PTM377	1193
PTM377	1214
PTM377	1268
PTM377	1020
PTM377	1136
PTM377	1265
PTM377	1020
PTM377	1121
PTM377	1199
PTM377	1244
PTM377	1185
PTM377	1085
PTM377	1187
PTM377	1102
PTM377	1288
PTM377	1113
PTM377	1306
PTM377	1361
PTM377	1168
PTM377	1223
PTM377	1158
PTM377	1346
PTM377	1156
PTM377	1159
PTM377	1231
PTM377	1215
PTM377	1124
PTM377	1141
PTM377	1183
PTM377	1190
PTM377	1291
PTM377	1112
PTM377	1311
PTM377	1082
PTM377	1253
PTM377	1247
PTM377	1268
PTM377	1235
PTM377	1037
PTM377	1269
PTM377	1234
PTM377	1127
PTM377	1321
PTM377	1203
PTM377	1246

## Sheet: figure 3E fitness
competition	rel fitness strain 1
PTM229xN2	0.013
PTM229xN2	0
PTM229xN2	-0.019
PTM229xCX12311	0.425
PTM229xCX12311	0.326
PTM229xCX12311	0.235
PTM229xCX12311	0.183
PTM229xCX12311	0.08
PTM229xPTM377	0.116
PTM229xPTM377	0.137
PTM229xPTM377	0.09
PTM229xPTM377	0.086
PTM229xPTM377	0.068
PTM229xPTM377	0.058
PTM229xPTM377	0.051
PTM229xPTM377	0.041
PTM229xPTM377	0.04
PTM229xPTM377	0.03
PTM229xPTM377	0.008
PTM229xPTM377	0
PTM229xPTM377	-0.009
PTM409xN2	0.013
PTM409xN2	-0.026
PTM409xN2	-0.03
PTM409xN2	-0.034
PTM409xN2	-0.04
PTM409xN2	-0.048
PTM409xN2	-0.061
PTM409xN2	-0.063
PTM409xN2	-0.077
PTM409xN2	-0.115

## Sheet: figure 3E DNA
competition	replicate	transfer	dpy-10 barcode allele DNA concentration (copied/ul)	dpy-10 WT DNA concentration (copied/ul)	dpy-10 barcode allele ratio
PTM229xN2	1	1	739	872	0.458721
PTM229xN2	1	3	520	605	0.462222
PTM229xN2	1	5	648	735	0.468547
PTM229xN2	1	7	461	515	0.472336
PTM229xN2	2	1	392	421	0.482165
PTM229xN2	2	3	740	798	0.481144
PTM229xN2	2	5	432	465	0.481605
PTM229xN2	2	7	814	874	0.482227
PTM229xN2	3	1	231	347	0.399654
PTM229xN2	3	3	270	419	0.391872
PTM229xN2	3	5	350	558	0.385463
PTM229xN2	3	7	523	852	0.380364
PTM229xCX12311	1	1	685	377	0.645009
PTM229xCX12311	1	3	237	72	0.76699
PTM229xCX12311	1	5	585	98	0.856515
PTM229xCX12311	1	7	307	28	0.916418
PTM229xCX12311	2	1	543	373	0.592795
PTM229xCX12311	2	3	641	280	0.695983
PTM229xCX12311	2	5	186	51	0.78481
PTM229xCX12311	2	7	467	82	0.850638
PTM229xCX12311	3	1	467	549	0.459646
PTM229xCX12311	3	3	181	153	0.541916
PTM229xCX12311	3	5	474	289	0.621232
PTM229xCX12311	3	7	869	385	0.692982
PTM229xCX12311	4	1	126	109	0.53617
PTM229xCX12311	4	3	416	281	0.596844
PTM229xCX12311	4	5	562	296	0.655012
PTM229xCX12311	4	7	169	68	0.71308
PTM229xCX12311	5	1	810	855	0.486486
PTM229xCX12311	5	3	817	766	0.516109
PTM229xCX12311	5	5	594	501	0.542466
PTM229xCX12311	5	7	809	611	0.569718
PTM229xPTM377	1	1	150	112	0.572519
PTM229xPTM377	1	3	691	439	0.611504
PTM229xPTM377	1	5	277	149	0.650235
PTM229xPTM377	1	7	491	226	0.684798
PTM229xPTM377	2	1	533	463	0.535141
PTM229xPTM377	2	3	695	501	0.581104
PTM229xPTM377	2	5	225	133	0.628492
PTM229xPTM377	2	7	522	257	0.67009
PTM229xPTM377	3	1	868	956	0.475877
PTM229xPTM377	3	3	887	859	0.508018
PTM229xPTM377	3	5	174	148	0.540373
PTM229xPTM377	3	7	699	529	0.569218
PTM229xPTM377	4	1	678	442	0.605357
PTM229xPTM377	4	3	470	272	0.633423
PTM229xPTM377	4	5	874	449	0.66062
PTM229xPTM377	4	7	662	302	0.686722
PTM229xPTM377	5	1	483	693	0.410714
PTM229xPTM377	5	3	285	373	0.433131
PTM229xPTM377	5	5	466	554	0.456863
PTM229xPTM377	5	7	746	809	0.479743
PTM229xPTM377	6	1	858	517	0.624
PTM229xPTM377	6	3	886	492	0.642961
PTM229xPTM377	6	5	699	358	0.661306
PTM229xPTM377	6	7	241	114	0.678873
PTM229xPTM377	7	1	787	506	0.608662
PTM229xPTM377	7	3	366	219	0.625641
PTM229xPTM377	7	5	237	133	0.640541
PTM229xPTM377	7	7	184	95	0.659498
PTM229xPTM377	8	1	373	275	0.575617
PTM229xPTM377	8	3	140	98	0.588235
PTM229xPTM377	8	5	684	451	0.602643
PTM229xPTM377	8	7	205	127	0.61747
PTM229xPTM377	9	1	615	447	0.579096
PTM229xPTM377	9	3	892	616	0.591512
PTM229xPTM377	9	5	469	304	0.606727
PTM229xPTM377	9	7	239	147	0.619171
PTM229xPTM377	10	1	387	539	0.417927
PTM229xPTM377	10	3	426	567	0.429003
PTM229xPTM377	10	5	799	1024	0.438289
PTM229xPTM377	10	7	390	480	0.448276
PTM229xPTM377	11	1	527	641	0.451199
PTM229xPTM377	11	3	737	891	0.452703
PTM229xPTM377	11	5	235	280	0.456311
PTM229xPTM377	11	7	672	791	0.45933
PTM229xPTM377	12	1	771	1273	0.377202
PTM229xPTM377	12	3	867	1429	0.377613
PTM229xPTM377	12	5	609	1010	0.376158
PTM229xPTM377	12	7	875	1443	0.377481
PTM229xPTM377	13	1	764	1233	0.382574
PTM229xPTM377	13	3	665	1084	0.380217
PTM229xPTM377	13	5	540	892	0.377095
PTM229xPTM377	13	7	726	1214	0.374227
PTM409xN2	1	1	895	708	0.558328
PTM409xN2	1	3	741	573	0.563927
PTM409xN2	1	5	499	383	0.56576
PTM409xN2	1	7	253	189	0.572398
PTM409xN2	2	1	778	926	0.456573
PTM409xN2	2	3	304	373	0.44904
PTM409xN2	2	5	560	714	0.43956
PTM409xN2	2	7	238	315	0.43038
PTM409xN2	3	1	351	603	0.367925
PTM409xN2	3	3	783	1406	0.357698
PTM409xN2	3	5	747	1398	0.348252
PTM409xN2	3	7	330	642	0.339506
PTM409xN2	4	1	719	539	0.571542
PTM409xN2	4	3	447	351	0.56015
PTM409xN2	4	5	583	479	0.548964
PTM409xN2	4	7	673	581	0.536683
PTM409xN2	5	1	587	673	0.465873
PTM409xN2	5	3	740	894	0.452876
PTM409xN2	5	5	680	880	0.435897
PTM409xN2	5	7	130	176	0.424837
PTM409xN2	6	1	418	694	0.375899
PTM409xN2	6	3	502	893	0.359857
PTM409xN2	6	5	663	1260	0.344774
PTM409xN2	6	7	614	1247	0.32993
PTM409xN2	7	1	246	263	0.483301
PTM409xN2	7	3	672	788	0.460274
PTM409xN2	7	5	441	561	0.44012
PTM409xN2	7	7	841	1159	0.4205
PTM409xN2	8	1	711	1084	0.3961
PTM409xN2	8	3	308	511	0.376068
PTM409xN2	8	5	873	1587	0.354878
PTM409xN2	8	7	770	1523	0.335805
PTM409xN2	9	1	418	310	0.574176
PTM409xN2	9	3	353	292	0.547287
PTM409xN2	9	5	865	798	0.520144
PTM409xN2	9	7	521	534	0.493839
PTM409xN2	10	1	449	341	0.568354
PTM409xN2	10	3	321	286	0.52883
PTM409xN2	10	5	291	305	0.488255
PTM409xN2	10	7	787	967	0.448689
