# Supplementary material for: A toxin-antidote selfish element increases fitness of its host
Source: eLife. 2023 Oct 24;12:e81640. doi: 10.7554/eLife.81640 (PMC10629817; doi:10.7554/eLife.81640)
Supplement: Figure 4—source data 1. [file elife-81640-fig4-data1.xlsx]

## Sheet: Figure 4C
cross	embryo lethality (%)
N2xCB4856	0.3
N2xCB4856	0.236364
N2xCB4856	0.222222
N2xCB4856	0.166667
N2xCB4856	0.1875
N2xCB4856	0.215686
PTM377xCB4856	0
PTM377xCB4856	0
PTM377xCB4856	0
PTM377xCB4856	0
PTM377xCB4856	0
PTM377xCB4856	0
PTM1000xCB4856	0.301887
PTM1000xCB4856	0.166667
PTM1000xCB4856	0.260274
PTM1000xCB4856	0.206349
PTM1000xCB4856	0.294118
PTM1000xCB4856	0.222222
PTM1003xCB4856	0
PTM1003xCB4856	0
PTM1003xCB4856	0
PTM1003xCB4856	0
PTM1003xCB4856	0
PTM1003xCB4856	0
PTM1006xCB4856	0
PTM1006xCB4856	0
PTM1006xCB4856	0
PTM1006xCB4856	0
PTM1006xCB4856	0
PTM1006xCB4856	0

## Sheet: Figure 4D fitness
competition (xPTM229)	rel fitness PTM229
N2	-0.053
N2	-0.011
N2	0.031
N2	-0.013
N2	-0.042
N2	-0.02
PTM377	0.062
PTM377	0.056
PTM377	0.203
PTM377	0.1
PTM377	0.026
PTM377	0.078
PTM1000	0.004
PTM1000	-0.053
PTM1000	0.044
PTM1000	-0.006
PTM1000	0.064
PTM1000	0.005
PTM1001	-0.04
PTM1001	-0.176
PTM1001	0.042
PTM1001	-0.007
PTM1001	0.044
PTM1001	0.098
PTM1003	0.088
PTM1003	0.095
PTM1003	0.119
PTM1003	0.128
PTM1003	0.184
PTM1003	0.08
PTM1004	0.125
PTM1004	0.23
PTM1004	0.02
PTM1004	-0.047
PTM1004	0.122
PTM1004	0.079
PTM1005	0.106
PTM1005	-0.044
PTM1005	0.082
PTM1005	0.078
PTM1005	0.123
PTM1005	0.004
PTM1006	0.152
PTM1006	0.051
PTM1006	-0.045
PTM1006	0.046
PTM1006	0.133
PTM1006	0.056

## Sheet: Figure 4D raw DNA
competition (xPTM229)	replicate	transfer	dpy-10 barcode allele DNA concentration (copied/ul)	dpy-10 WT allele DNA concentration (copied/ul)	dpy-10 barcode allele ratio
N2	1	1	569	1003	0.361959
N2	2	1	230	127	0.644258
N2	3	1	108	141	0.433735
N2	4	1	609	348	0.636364
N2	5	1	297	269	0.524735
N2	6	1	491	365	0.573598
N2	1	3	841	1595	0.345238
N2	2	3	439	245	0.641813
N2	3	3	415	523	0.442431
N2	4	3	603	353	0.630753
N2	5	3	184	176	0.511111
N2	6	3	338	258	0.567114
N2	1	5	802	1646	0.327614
N2	2	5	546	311	0.637106
N2	3	5	166	200	0.453552
N2	4	5	596	351	0.629356
N2	5	5	539	547	0.496317
N2	6	5	816	640	0.56044
N2	1	7	896	1967	0.312958
N2	2	7	227	131	0.634078
N2	3	7	843	974	0.463952
N2	4	7	536	324	0.623256
N2	5	7	578	625	0.480466
N2	6	7	642	519	0.552972
PTM1000	1	1	699	942	0.42596
PTM1000	2	1	586	755	0.436987
PTM1000	3	1	631	643	0.49529
PTM1000	4	1	464	571	0.448309
PTM1000	5	1	209	262	0.443737
PTM1000	6	1	789	511	0.606923
PTM1000	1	3	579	776	0.427306
PTM1000	2	3	114	158	0.419118
PTM1000	3	3	527	503	0.51165
PTM1000	4	3	831	1026	0.447496
PTM1000	5	3	193	222	0.46506
PTM1000	6	3	611	391	0.60978
PTM1000	1	5	473	628	0.429609
PTM1000	2	5	420	620	0.403846
PTM1000	3	5	678	611	0.525989
PTM1000	4	5	524	656	0.444068
PTM1000	5	5	187	196	0.488251
PTM1000	6	5	273	173	0.612108
PTM1000	1	7	500	662	0.430293
PTM1000	2	7	521	837	0.383652
PTM1000	3	7	255	216	0.541401
PTM1000	4	7	238	300	0.442379
PTM1000	5	7	442	425	0.509804
PTM1000	6	7	528	335	0.611819
PTM1001	1	1	396	449	0.468639
PTM1001	2	1	312	249	0.55615
PTM1001	3	1	541	325	0.624711
PTM1001	4	1	465	598	0.437441
PTM1001	5	1	360	551	0.39517
PTM1001	6	1	186	297	0.385093
PTM1001	1	3	827	993	0.454396
PTM1001	2	3	773	794	0.493299
PTM1001	3	3	553	314	0.637832
PTM1001	4	3	198	257	0.435165
PTM1001	5	3	484	696	0.410169
PTM1001	6	3	596	832	0.417367
PTM1001	1	5	610	772	0.441389
PTM1001	2	5	791	1033	0.433662
PTM1001	3	5	446	237	0.653001
PTM1001	4	5	457	596	0.433998
PTM1001	5	5	798	1078	0.425373
PTM1001	6	5	566	686	0.452077
PTM1001	1	7	811	1089	0.426842
PTM1001	2	7	131	218	0.375358
PTM1001	3	7	786	395	0.665538
PTM1001	4	7	165	218	0.430809
PTM1001	5	7	768	978	0.439863
PTM1001	6	7	493	522	0.485714
PTM1003	1	1	303	440	0.407806
PTM1003	2	1	495	433	0.533405
PTM1003	3	1	423	517	0.45
PTM1003	4	1	505	490	0.507538
PTM1003	5	1	857	956	0.472697
PTM1003	6	1	176	221	0.443325
PTM1003	1	3	326	417	0.438762
PTM1003	2	3	520	396	0.567686
PTM1003	3	3	769	799	0.490434
PTM1003	4	3	620	506	0.550622
PTM1003	5	3	570	491	0.537229
PTM1003	6	3	809	910	0.470622
PTM1003	1	5	245	281	0.465779
PTM1003	2	5	484	324	0.59901
PTM1003	3	5	386	340	0.53168
PTM1003	4	5	132	90	0.594595
PTM1003	5	5	343	231	0.597561
PTM1003	6	5	611	616	0.497963
PTM1003	1	7	893	899	0.498326
PTM1003	2	7	149	87	0.631356
PTM1003	3	7	287	214	0.572854
PTM1003	4	7	117	66	0.639344
PTM1003	5	7	600	311	0.658617
PTM1003	6	7	276	248	0.526718
PTM1004	1	1	584	599	0.49366
PTM1004	2	1	605	493	0.551002
PTM1004	3	1	428	501	0.46071
PTM1004	4	1	871	568	0.605281
PTM1004	5	1	851	1244	0.406205
PTM1004	6	1	470	313	0.600255
PTM1004	1	3	807	694	0.537642
PTM1004	2	3	519	308	0.62757
PTM1004	3	3	553	634	0.46588
PTM1004	4	3	193	133	0.592025
PTM1004	5	3	127	156	0.448763
PTM1004	6	3	862	511	0.627822
PTM1004	1	5	389	283	0.578869
PTM1004	2	5	109	46	0.703226
PTM1004	3	5	630	700	0.473684
PTM1004	4	5	432	323	0.572185
PTM1004	5	5	208	215	0.491726
PTM1004	6	5	452	240	0.653179
PTM1004	1	7	694	423	0.621307
PTM1004	2	7	806	252	0.761815
PTM1004	3	7	447	481	0.481681
PTM1004	4	7	402	319	0.557559
PTM1004	5	7	276	242	0.532819
PTM1004	6	7	558	268	0.675545
PTM1005	1	1	163	166	0.495441
PTM1005	2	1	315	407	0.436288
PTM1005	3	1	397	721	0.355098
PTM1005	4	1	730	665	0.523297
PTM1005	5	1	172	105	0.620939
PTM1005	6	1	299	406	0.424113
PTM1005	1	3	502	441	0.532344
PTM1005	2	3	742	1023	0.420397
PTM1005	3	3	149	241	0.382051
PTM1005	4	3	522	428	0.549474
PTM1005	5	3	867	448	0.659316
PTM1005	6	3	726	987	0.423818
PTM1005	1	5	810	616	0.568022
PTM1005	2	5	115	168	0.40636
PTM1005	3	5	702	1008	0.410526
PTM1005	4	5	898	657	0.577492
PTM1005	5	5	136	59	0.697436
PTM1005	6	5	526	703	0.42799
PTM1005	1	7	621	408	0.603499
PTM1005	2	7	295	458	0.391766
PTM1005	3	7	853	1100	0.436764
PTM1005	4	7	550	361	0.603732
PTM1005	5	7	797	292	0.731864
PTM1005	6	7	638	853	0.427901
PTM1006	1	1	317	387	0.450284
PTM1006	2	1	306	433	0.414073
PTM1006	3	1	695	879	0.44155
PTM1006	4	1	267	346	0.435563
PTM1006	5	1	314	272	0.535836
PTM1006	6	1	789	504	0.610209
PTM1006	1	3	806	799	0.502181
PTM1006	2	3	740	971	0.432496
PTM1006	3	3	831	1118	0.426372
PTM1006	4	3	313	378	0.452967
PTM1006	5	3	234	169	0.580645
PTM1006	6	3	423	249	0.629464
PTM1006	1	5	732	586	0.555387
PTM1006	2	5	318	393	0.447257
PTM1006	3	5	261	373	0.411672
PTM1006	4	5	419	475	0.46868
PTM1006	5	5	715	429	0.625
PTM1006	6	5	577	317	0.645414
PTM1006	1	7	221	143	0.607143
PTM1006	2	7	646	739	0.466426
PTM1006	3	7	590	898	0.396505
PTM1006	4	7	819	879	0.482332
PTM1006	5	7	551	274	0.667879
PTM1006	6	7	473	239	0.664326
PTM377	1	1	298	446	0.400538
PTM377	2	1	595	1029	0.366379
PTM377	3	1	234	160	0.593909
PTM377	4	1	393	451	0.46564
PTM377	5	1	425	368	0.535939
PTM377	6	1	786	903	0.465364
PTM377	1	3	577	794	0.420861
PTM377	2	3	691	1115	0.382614
PTM377	3	3	554	285	0.66031
PTM377	4	3	381	380	0.500657
PTM377	5	3	262	218	0.545833
PTM377	6	3	459	471	0.493548
PTM377	1	5	833	1046	0.443321
PTM377	2	5	488	723	0.402973
PTM377	3	5	774	302	0.719331
PTM377	4	5	615	533	0.535714
PTM377	5	5	592	480	0.552239
PTM377	6	5	196	181	0.519894
PTM377	1	7	546	632	0.463497
PTM377	2	7	654	898	0.421392
PTM377	3	7	559	165	0.772099
PTM377	4	7	319	241	0.569643
PTM377	5	7	625	485	0.563063
PTM377	6	7	423	350	0.547219
